# Supplementary material
Source: Research Square preprint supplement (doi:10.21203/rs.3.rs-8996305/v1)
Supplement: Supplementary file 1 [file 1e9212ac88f26b3c0c07a5d6.docx]

**(A)**

**
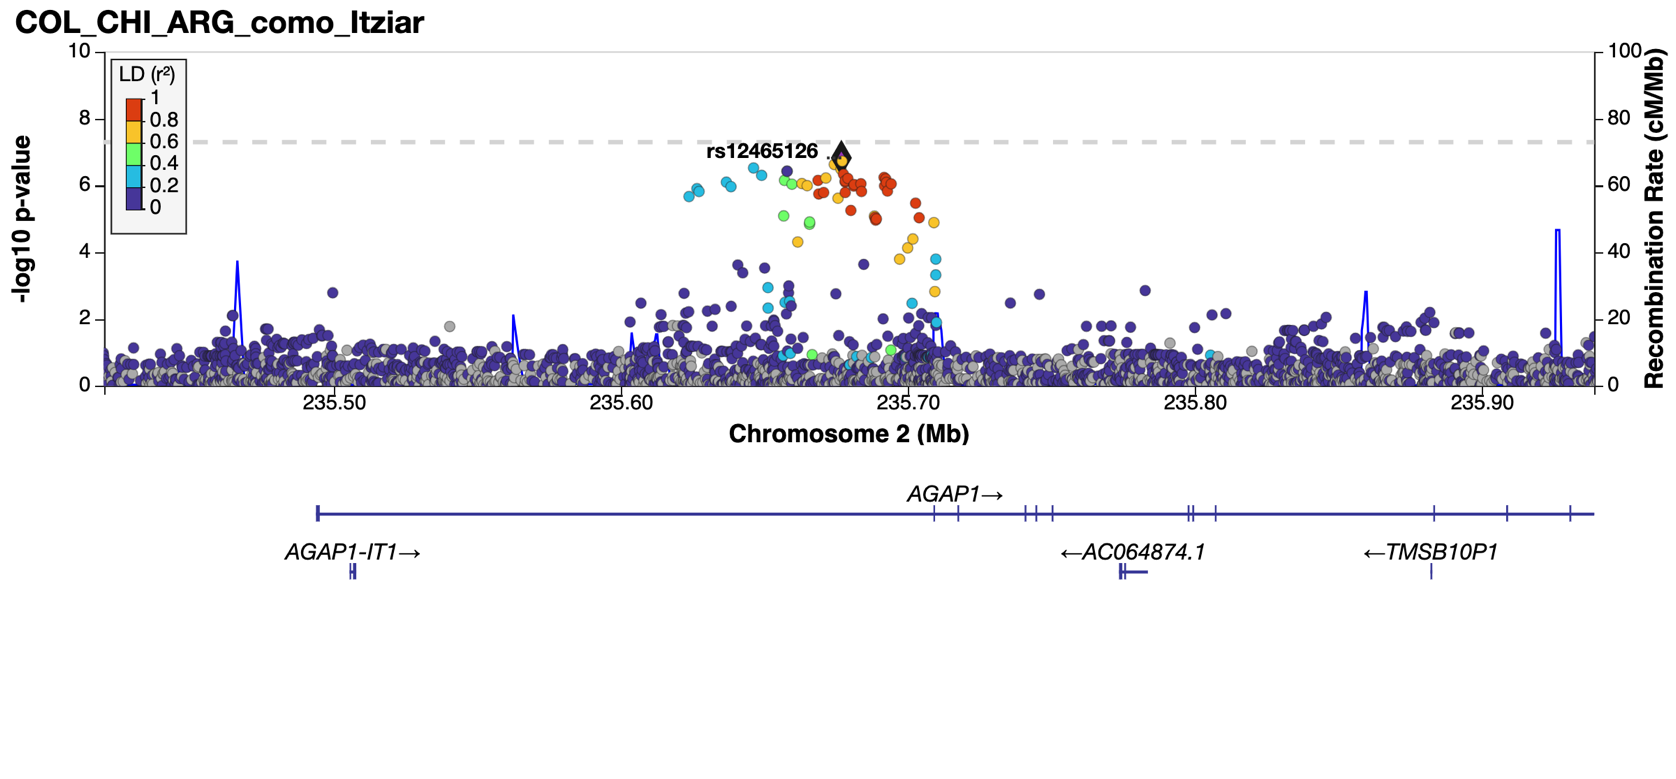
**

**(B)**

***
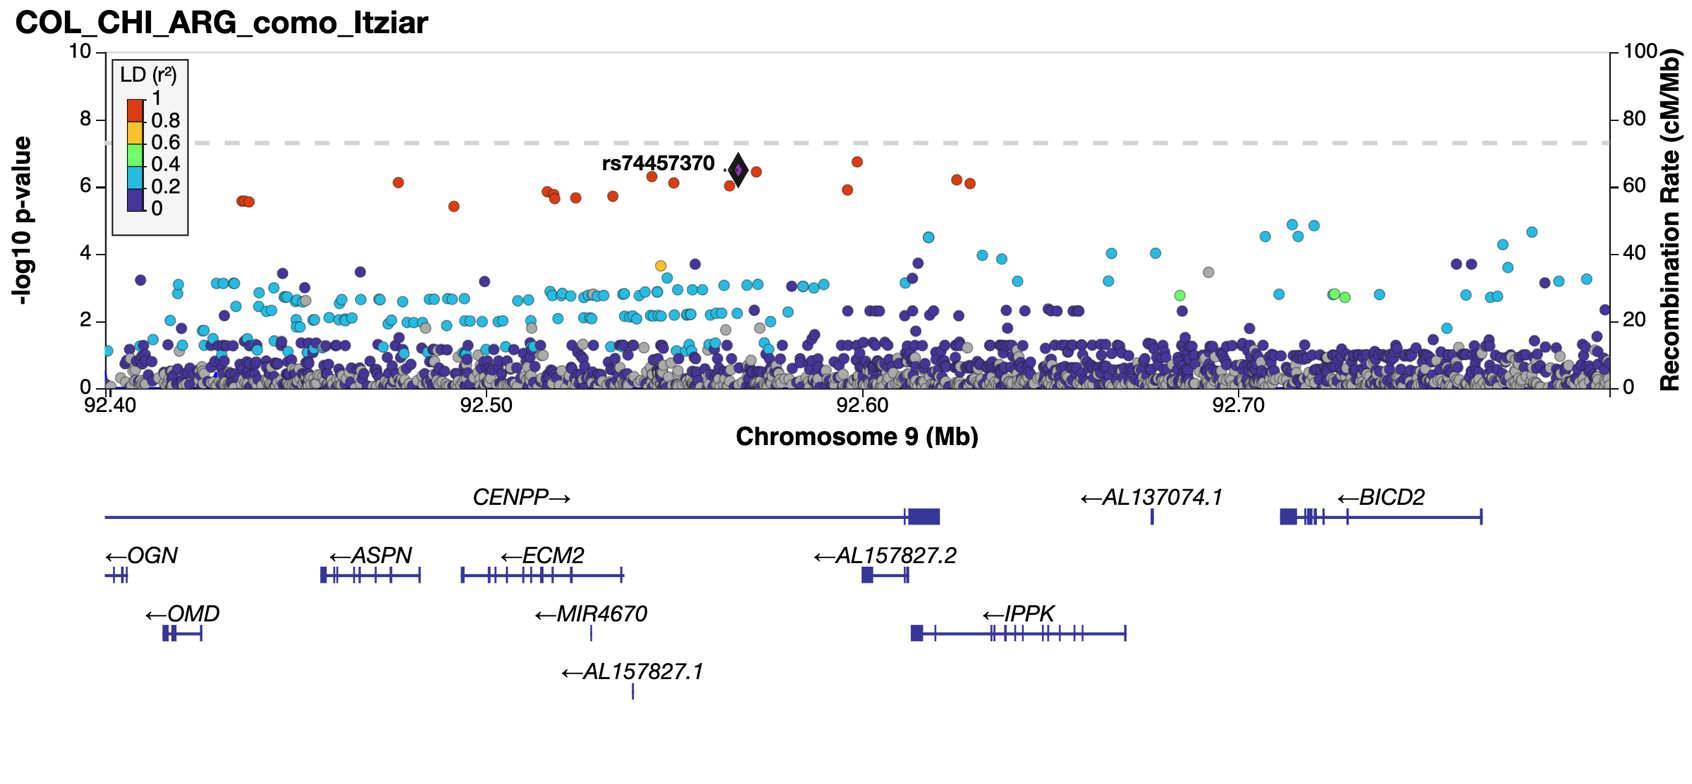
***

**(C)**

**
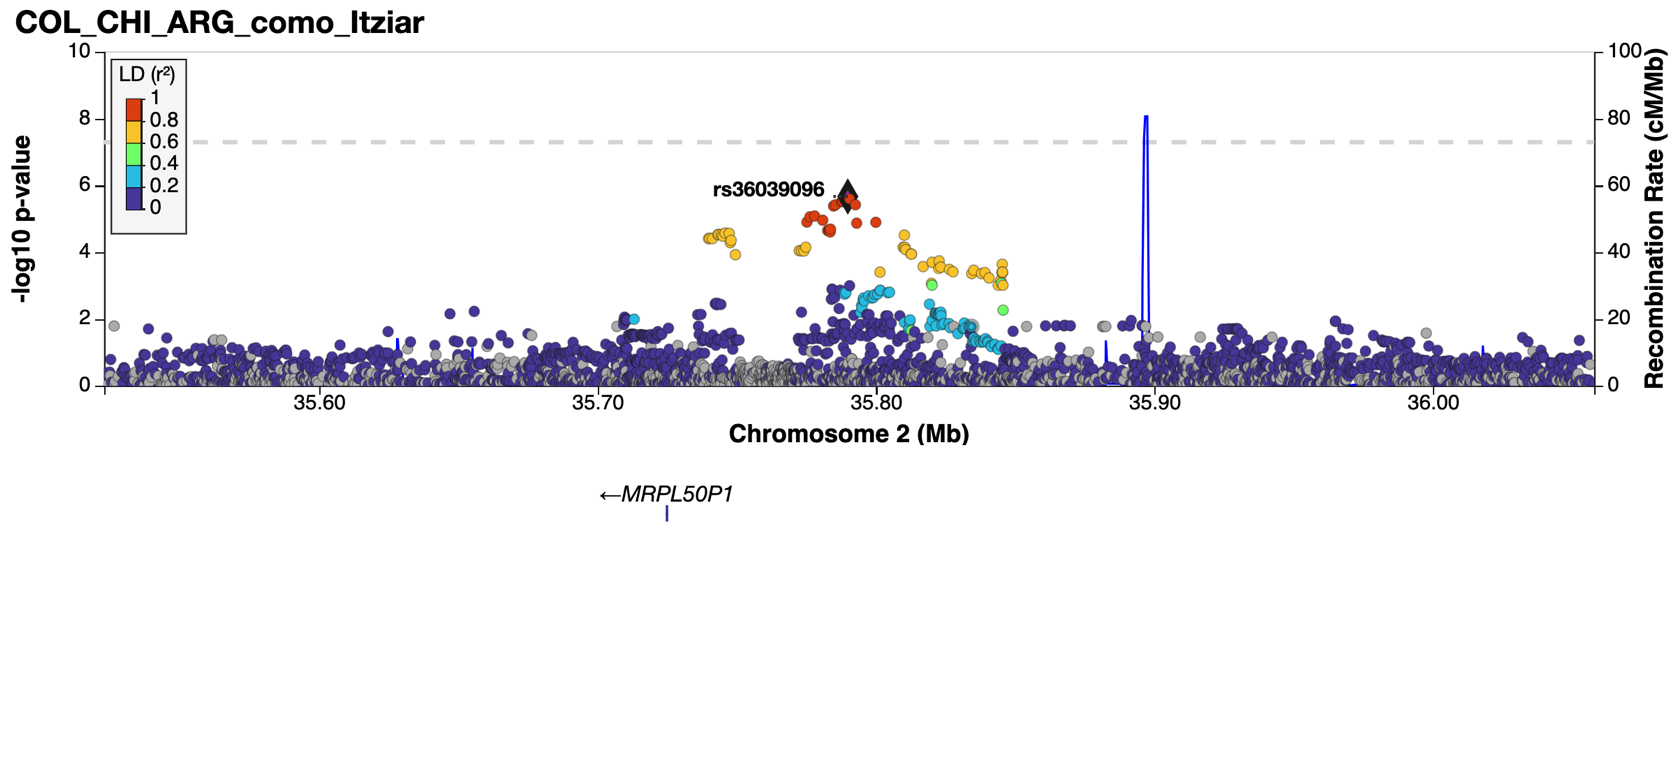
**

**Supplementary Figure 2.** **Regional association plots for three loci that gain significance with the inclusion of Colombian samples.** **(A)** *AGAP1* locus with lead SNP rs12465126, **(B)** *CENPP* locus with lead SNP rs74457370 and **(C)** *MRPL50P1* locus with lead SNP rs36039096.Points represent SNP –log₁₀*P*-values colored by LD (*r²*) with the lead variant (black diamond). Genomic coordinates are provided on the x-axis (Mb), and recombination rates (cM/Mb) are plotted on the secondary y-axis (right) to indicate local recombination hotspots. Gene annotations below each plot illustrate the structure and orientation of nearby genes.
