# Supplementary material
Source: Research Square preprint supplement (doi:10.21203/rs.3.rs-8996305/v1)
Supplement: Supplementary file 2 [file ad3469ab3dedb3a589e03a0a.docx]

**(A)**

**(B)**

**Supplementary Figure 4. Linear regression model (LRM) showing the relationship between PRS and Native American (NAM) ancestry, based on 73 EADB genome-wide significant SNPs reported in Bellenguez et al. 2022**. LRM derived from ARG-CHI meta-analysis **(A)** and LRM derived from EADB stage I **(B)**. NAM ancestry (x-axis) and PRS values (y-axis). AD-cases are in red and controls in black. Lines and shadings represent the linear fits and 95% confidence interval, respectively.
