# Supplementary material
Source: Research Square preprint supplement (doi:10.21203/rs.3.rs-8996305/v1)
Supplement: Supplementary file 3 [file d0a9bdce6e0ec0b4016744d0.docx]

**(A)**


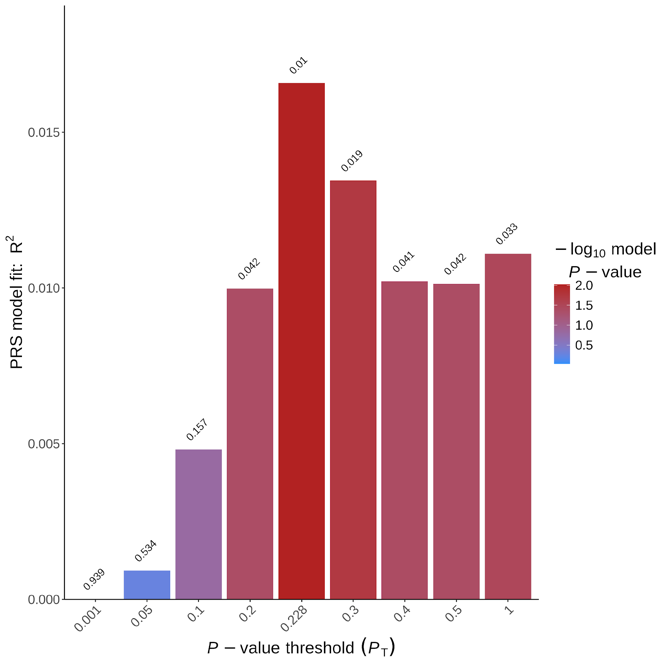


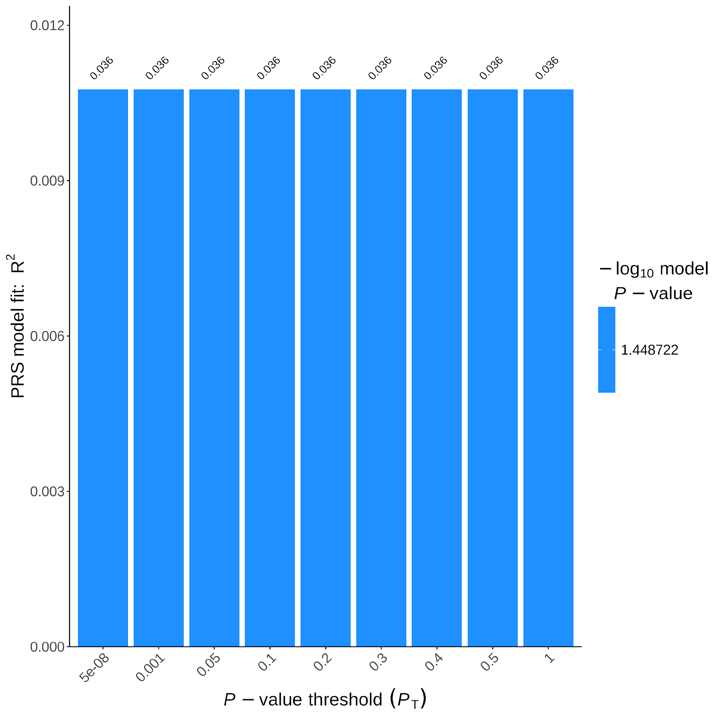
(**B)**

**
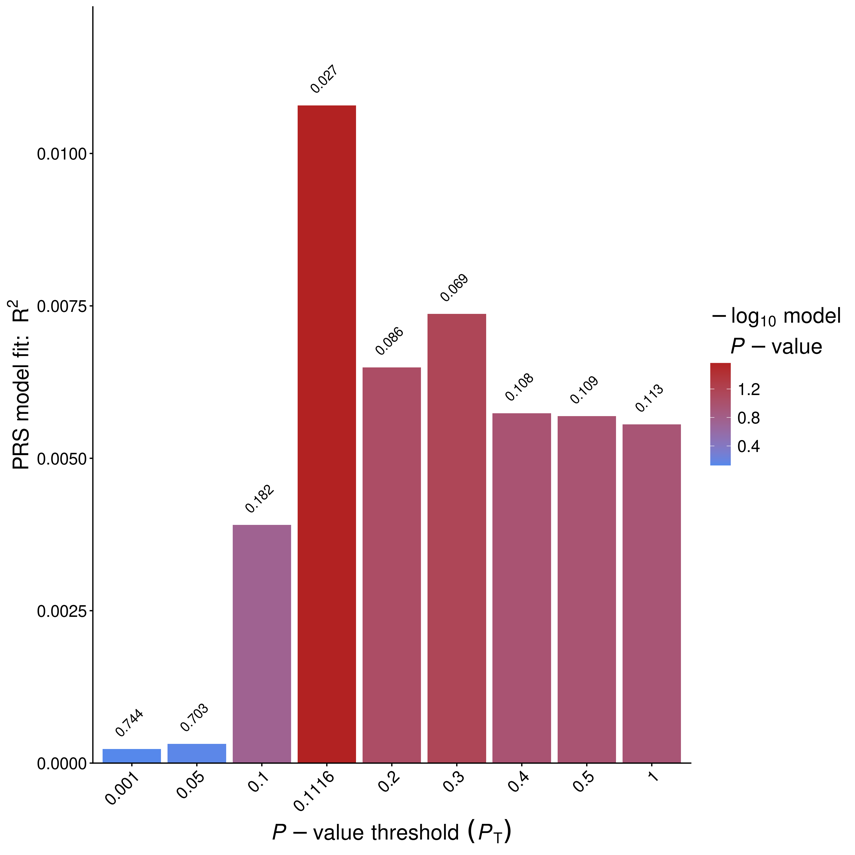
(C)**

**
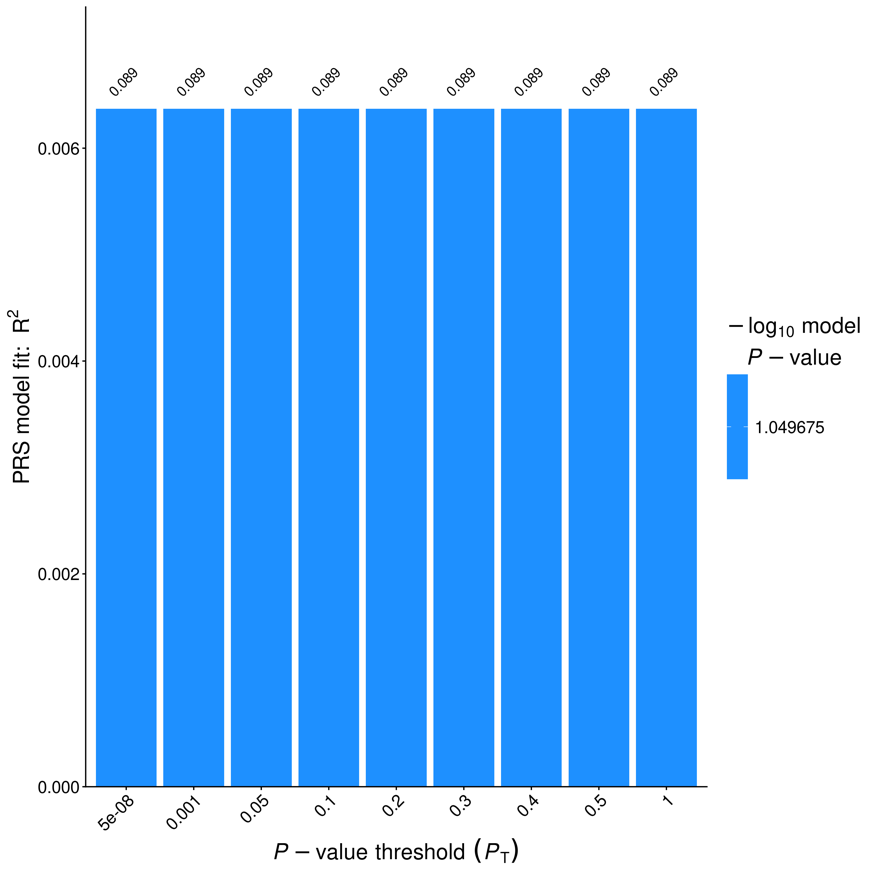
(D)**

**(E)**


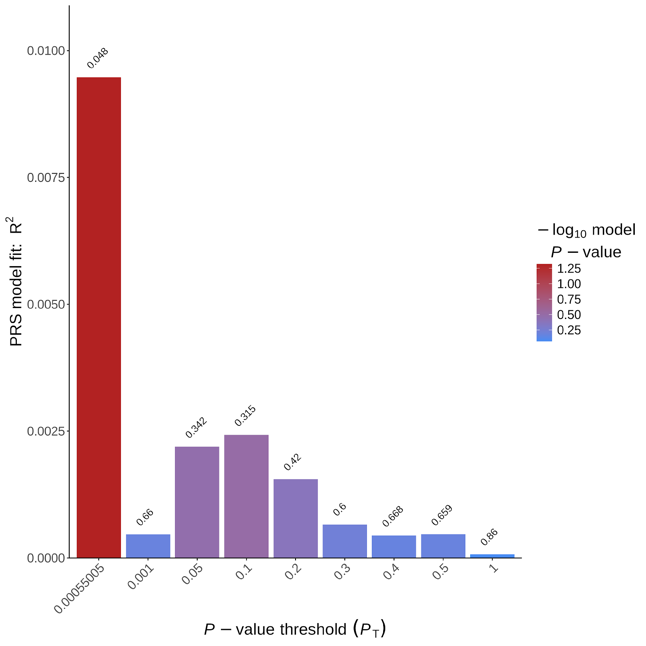


**(F)**


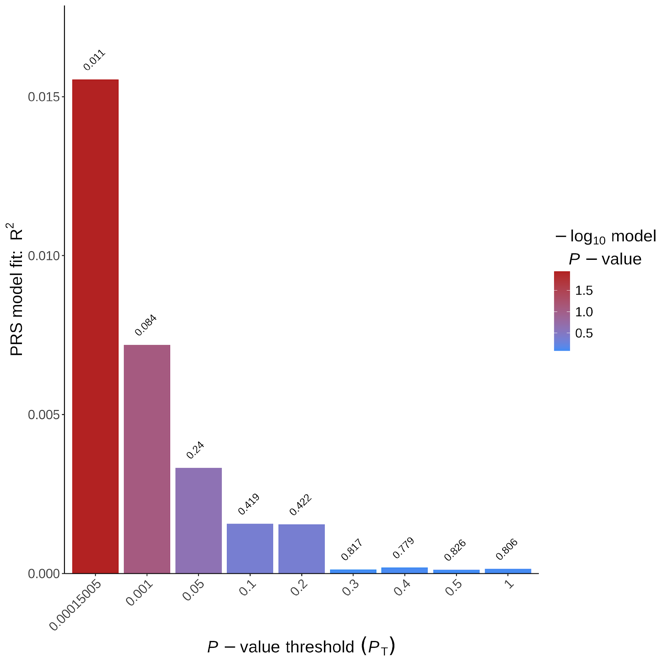


**
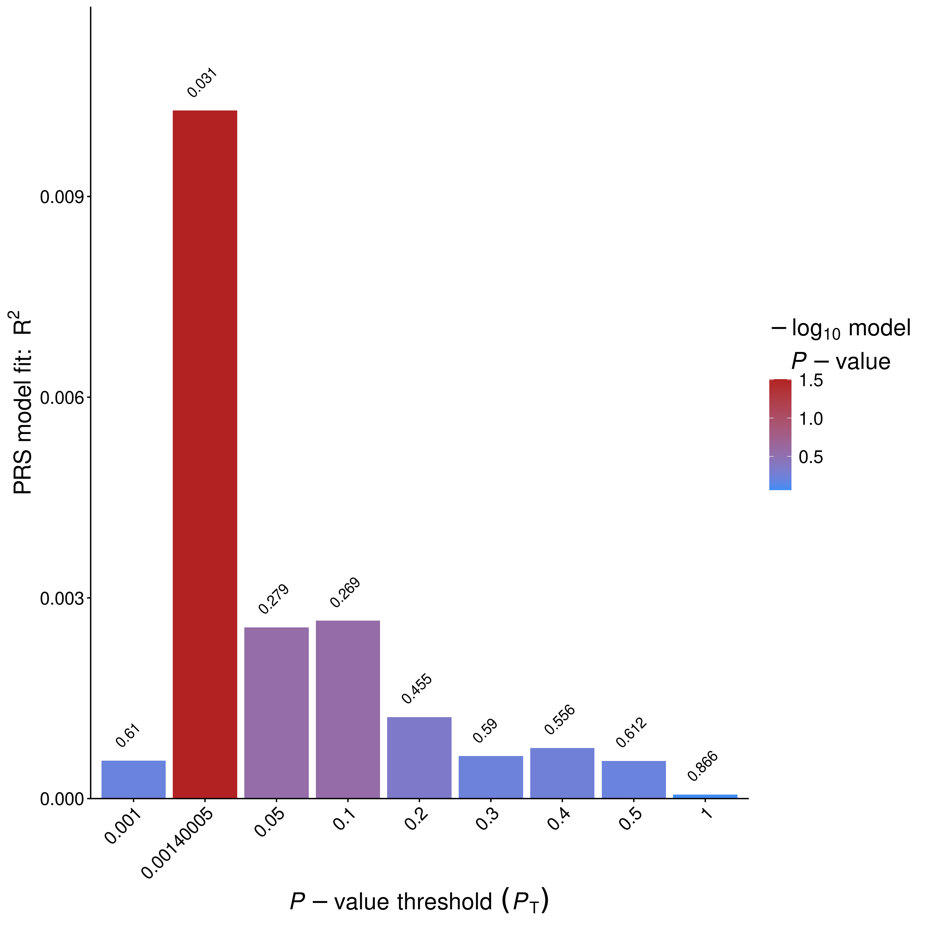
(G)**

**
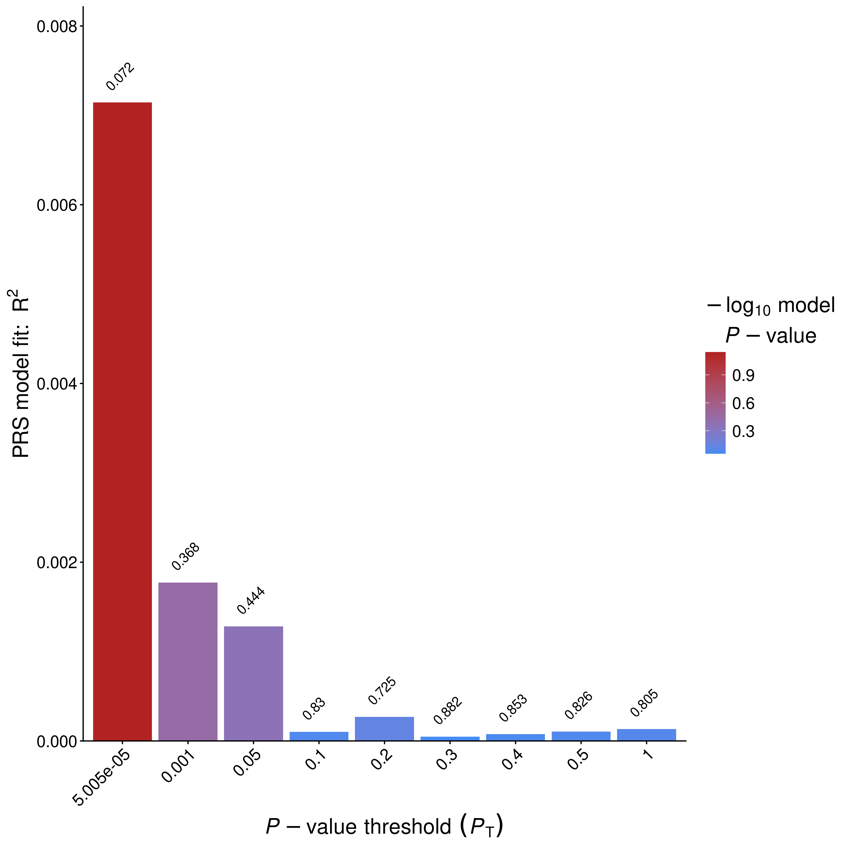
(H)**

**Supplementary Figure 3. Polygenic risk score (PRS) model fit (R²) across multiple *P*-value thresholds (PT) in the Colombian cohort.** PRSGS-only models are shown without *APOE* adjustment using ARG-CHI **(A)** and EADB stage I **(B)** as base datasets, and with adjusted for the number of alleles present for *APOE*-ε2 and -ε4 using ARG-CHI **(C)** and EADB stage I **(D).** PRSLD-pruned models (300 kb window, 50 kb step size, r² = 0.03) are shown without *APOE* adjustment using ARG-CHI **(E)** and EADB stage I **(F)**, and with adjusted for the number of alleles present for *APOE*-ε2 and -ε4 using ARG-CHI **(G)** and EADB stage I **(H)**. Bar colors represent the -log10 of the model *P*-values, and R2 values indicate the proportion of the phenotypic variance explained at each threshold.
