# Supplementary material
Source: Research Square preprint supplement (doi:10.21203/rs.3.rs-8996305/v1)
Supplement: Supplementary file 4 [file ebe144ff416287e4347b2999.docx]

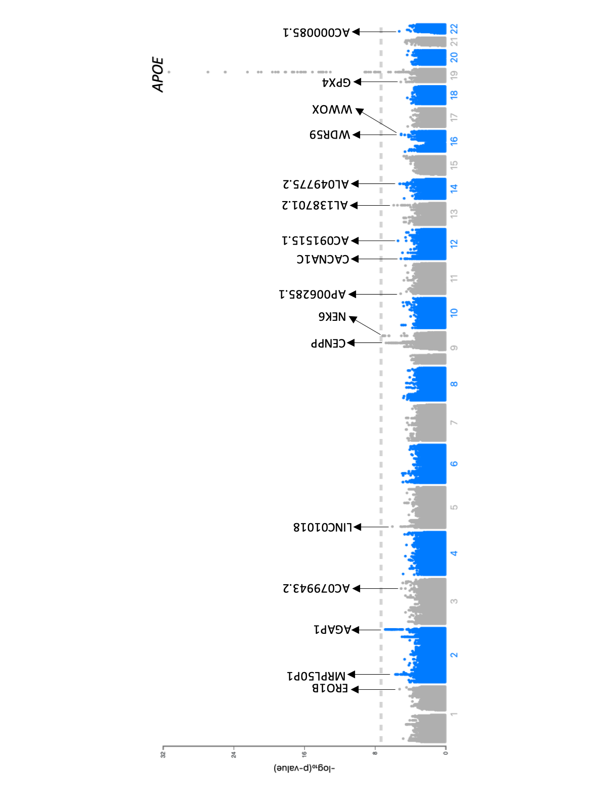


**Supplementary Figure 1.** **Manhattan Plot displaying the meta-analysis of Colombian, Argentinian and Chilean samples.** The dotted line represents the genome-wide significance level (*P* = 5 x 10-8). Loci designated with arrows have suggestive significance level (p = 1x10-5). Annotation is based on the closest feature.
