# Supplementary material
Source: Research Square preprint supplement (doi:10.21203/rs.3.rs-8996305/v1)
Supplement: Supplementary file 5 [file ffd043c62109867f986c2d1d.xlsx]

## Sheet: Supplementary Table 1
Supplementary Table 1. Comparison of previously reported Alzheimer’s disease loci in Hispanos/Latin Americans with the Colombian population and COL-ARG-CHI meta-analysis.
								Colombia population			Meta-analysis of Colombia, Argentina and Chile populations
Study	Genomic coordinates	RS	Gene	Effect allele	MAF	OR[95% CI]†	P value	MAF	OR	P value	MAF	OR	P value
Kizil et al., 2022
	chr22:37816617	rs17856459	GCAT	T	0.01	2.61[2.24-4.16]	0.037	0.0118752	3.88[0.65-23.27]	0.138164	0.0107	2.17[0.98-4.78]	0.05607
	chr19:46534363	rs11668571	PPP5D1P	A	-	1.12[1.02-1.21]	0.0363	0.617	0.82[0.62-1.10]	0.196786	-	-	-
	chr6:165827178	rs9295314	PDE10A	A	-	1.08[0.98-1.18]	0.0932	0.739182	1.10[0.81-1.50]	0.526	0.729	1.01[0.87-1.18]	0.853
	chr1:112246666	rs7527003	LINC02884	A	-	1.11[1.01-1.20]	0.0268	0.136	1.06[0.71-1.57]	0.787	0.729	1.01[0.87-1.18]	0.8532
Akgun et al., 2023
	chr1:204934830	rs2625222	NFASC	C	0.013	7.64[3.74-15.61]	3.5e-08	0.0633947	0.78[0.44-1.40]	0.409191	0.9257	1.02[0.79-1.33]	0.8643
	chr5:147301014	rs4441917	STK32A	C	0.422	0.45[0.33-0.61]	1.3e-07	0.696241	1.32[0.98-1.80]	0.0718294	0.6778	1.10[0.95-1.27]	0.2196
	chr17:27248016	rs56281491	RP11-663N22.1	G	0.394	2.05[1.55-2.73]	3.4e-07	0.535503	0.84[0.62-1.15]	0.282767	0.4506	1.09[0.94-1.27]	0.2323
Horimoto et al., 2023
	chr13:107373320	rs4444189	NALF1	G	-	0.41[0.27-063]	4.2e-05	0.662346	1.18[0.87-1.61]	0.292419	0.3738	0.93[0.80-1.08]	0.3478
	chr13:108159386	rs16972067	-	T	-	0.37[0.23-0.59]	3.3e-05	0.0264031	2.12[0.71-631]	0.175895	0.0389	1.34[0.92-1.96]	0.1248
	chr13:108630457	rs16972815	MYO16	T	-	0.38[0.24-0.59]	3e-05	0.0163404	1.54[0.50-4.78]	0.450254	0.0142	1.37[0.75-2.49]	0.3062
Akgun et al., 2024
	chr1:222779085	rs4240935	AL392172.2	T	0.39	1.76[1.39-2.22]	2.2e-06	0.68	0.92 [0.67-1.26]	0.594124	0.59	0.99[0.85-1.14]	0.8467
	chr4:60211881	rs11131227	AC097655.1	A	0.3	0.50[0.66-0.38]	6e-07	0.754654	0.93[0.65-1.33]	0.697633	0.7758	1.11[0.94-1.32]	0.216
	chr12:46230329	rs11183403	SLC38A1	C	0.34	1.78[1.41-2.25]	1e-06	0.301993	0.79[0.57-1.09]	0.148685	0.7132	1.09[0.92-1.28]	0.324
	chr12:51658428	rs7953996	SCN8A	G	0.2	1.98[2.59-1.51]	6e-07	0.846818	0.92[0.60-1.41]	0.71364	0.1719	0.98[0.81-1.19]	0.8669
Abbreviations: Genomic coordinates are reported in GRCh38/hg38 format; RS, snp identifier; Gene, gene name; Effect allele, allele used to compute the reported odds ratio; MAF, Frequency of the minor allele; OR, odds ratio; P, p-value
†Odds ratio [95% confidence interval].

## Sheet: Supplementary Table 2
Supplementary Table 2. Replication of the SNPs associated with Alzheimer's disease selected from the European Alzheimer’s and Dementia Biobank (EADB) in Colombia, Argentina and Chile populations.
Results obtained with an association and fixed-effects inverse-variance-weighted meta-analysis. Effect reported by minnor allele (MAF-Allele 1). P-value for significance <5×10−8. Highlighted in red p-value for replicated loci (p<0.05). Highlighted in blue p-value for loci genome-wide significant in the EADB-COL-AGR-CHI meta-analysis. OR[95% CI]: Odds Ratio [95% confidence interval], MAF: Minnor a…
							EADB stage I		EADB (Stage I+II)			Argentina Population				Chile population				Meta-analysis of Argentina and Chile populations				Meta-analysis of EADB stage I with Argentina and Chile populations						Colombia population				Meta-analysis of Colombia, Argentina and Chile populations				Meta-analysis of EADB stage I with Colombia, Argentina and Chile populations
ID	RS	Gene	Chromosome	Position	Alelle 1 (MAF)	Allele 2	P-value	OR[CI95%]	P-value	OR[CI95%]	MAF	P-value	OR[CI95%]	MAF	Rsq	P-value	OR[CI95%]	MAF	Rsq	P-value	OR[CI95%]	MAF	Direction	P-value	OR[CI95%]	Direction	HetISq	HetPVal	Improved P-value	P-value	OR[CI95%]	MAF	Rsq	P-value	OR[CI95%]	MAF	Direction	P-value	OR[CI95%]	Direction	HetISq	HetPVal	Improved P-value EADB stage I	Improved P-value EADB stage I-ARG-CHI
chr1:109345810:T:C	rs141749679	SORT1	1	109345810	C	T	7.99e-06	1.37 (1.19-1.57)	7.5e-09	1.38[1.24–1.54]	0.004	0.2113	2.90[0.55-15.38]	0.0033	0.929	0.5541	2.31[0.14-37.25]	0.003	0.8997	0.1688	2.73[0.65-11.42]	0.0032	--	4.78e-06	1.38[1.20-1.58]	---	0	0.635	yes	0.4238	5.19[0.09-293.88]	0.002	0.9323	0.2113	0.35 [0.07-1.83]	0.9967	?-?	5.35e-06	0.73 [0.63-0.83]	-?-?	0	0.379	yes	no
chr1:207577223:T:C	rs679515	CR1	1	207577223	T	C	5.15e-33	1.13 (1.11-1.16)	7.2e-46	1.13[1.11–1.15]	0.188	0.0586	1.28[0.99-1.65]	0.1709	0.967	0.2128	1.34[0.85-2.12]	0.1348	0.9643	0.0239	1.29[1.03-1.62]	0.1623	++	8.55e-34	1.13[1.11-1.16]	+++	0	0.502	yes	0.182	1.35[0.87-2.11]	0.8899	1	0.2228	1.13 [0.93-1.38]	0.1505	-++	2.67e-33	1.13 [1.11-1.16]	+-++	51.9	0.101	yes	no
chr2:9558882:A:G	rs72777026	ADAM17	2	9558882	G	A	1.91e-06	1.06 (1.03-1.08)	2.7e-08	1.06[1.04–1.08]	0.144	0.6977	0.94[0.71-1.26]	0.1308	0.8775	0.6757	1.11[0.68-1.81]	0.1083	0.946	0.9054	0.98[0.77-1.27]	0.1249	+-	2.14e-06	1.06[1.03-1.08]	-+-	0	0.733	no	0.7431	1.07[0.70-1.64]	0.1329	0.945	0.8327	1.02 [0.83-1.26]	0.8727	++-	2.37e-06	0.95 [0.92-0.97]	-++-	0	0.835	no	no
chr2:37304796:T:C	rs17020490	PRKD3	2	37304796	C	T	3.29e-06	1.06 (1.03-1.08)	3.3e-09	1.06[1.04–1.08]	0.145	0.0108	1.35[1.07-1.69]	0.2775	0.9792	0.043	1.38[1.01-1.89]	0.3743	0.9895	0.0011	1.36[1.13-1.63]	0.3112	--	4.91e-07	1.06[1.04-1.08]	---	71.8	0.029	yes	0.8321	0.97[0.73-1.29]	0.4553	0.9519	0.0161	0.83 [0.71-0.97]	0.6416	+--	6.58e-07	0.94 [0.92-0.97]	-+--	61.9	0.049	yes	no
chr2:105749599:T:C	rs143080277	NCK2	2	105749599	C	T	7.89e-11	1.48 (1.31-1.66)	2.1e-13	1.47[1.33–1.63]	0.005	0.6221	0.69[0.16-2.96]	0.0046	0.8683	0.8111	0.72[0.05-10.64]	0.0072	0.4929	0.5842	0.70[0.20-2.51]	0.0052	++	1.32e-10	1.47[1.31-1.65]	-++	0	0.52	no	0.3264	18.62[0.05-6401.24]	0.0022	0.5224	0.6221	1.44 [0.34-6.12]	0.9954	?+?	1.18e-10	0.68 [0.60-0.76]	-?+?	3.8	0.308	no	yes
chr2:127135234:C:T	rs6733839	BIN1	2	127135234	T	C	6.48e-90	1.18 (1.16-1.2)	6.1e-118	1.17[1.16–1.19]	0.389	0.1814	1.13[0.94-1.36]	0.4359	0.9985	0.3346	1.16[0.86-1.57]	0.4712	0.9972	0.1003	1.14[0.97-1.33]	0.4454	++	3.77e-90	1.18[1.16-1.20]	+++	0	0.893	yes	0.0592	1.31[0.99-1.74]	0.5097	0.9971	0.0133	1.18 [1.04-1.36]	0.4627	+++	6.09e-91	1.18 [1.16-1.20]	++++	0	0.836	yes	yes
chr2:202878716:TC:T	rs139643391	WDR12	2	202878716	T	TC	2.56e-07	0.94 (0.92-0.96)	1.1e-08	0.94[0.92–0.96]	0.131	0.0898	1.32[0.96-1.83]	0.0944	0.9989	0.7591	1.09[0.63-1.88]	0.0975	0.9947	0.1059	1.26[0.95-1.66]	0.0952	++	5.55e-07	0.94[0.92-0.96]	-++	56.3	0.102	no	0.5141	1.18[0.72-1.94]	0.0878	0.9985	0.0762	1.24 [0.98-1.57]	0.0932	+++	7.02e-07	0.94 [0.92-0.96]	-+++	46.4	0.133	no	no
chr2:233117202:G:C	rs10933431	INPP5D	2	233117202	G	C	1.04e-17	0.92 (0.9-0.94)	3.6e-18	0.93[0.92–0.95]	0.234	0.0792	0.83[0.67-1.02]	0.301	0.8604	0.0962	0.75[0.53-1.05]	0.3098	0.9954	0.0177	0.80[0.67-0.96]	0.3034	++	1.25e-18	0.92[0.90-0.93]	+++	13	0.317	yes	0.8174	0.96[0.70-1.32]	0.5967	0.8475	0.0782	1.15 [0.98-1.34]	0.6683	-++	1.97e-18	1.09 [1.07-1.11]	+-++	11.9	0.334	yes	no
chr3:155069722:G:A	rs16824536	MME	3	155069722	A	G	3.78e-06	0.92 (0.89-0.95)	3.6e-08	0.92[0.89–0.95]	0.054	0.6848	1.10[0.69-1.78]	0.0364	0.9991	0.1332	0.32[0.07-1.42]	0.02	1	0.9475	0.98[0.63-1.55]	0.0349	+-	3.78e-06	0.92[0.89-0.95]	-+-	20.2	0.286	no	0.7035	1.19[0.49-2.86]	0.0341	0.7772	0.9934	1.00 [0.67-1.48]	0.0347	++-	3.96e-06	0.92 [0.89-0.95]	-++-	0	0.457	no	no
chr3:155084189:A:G	rs61762319	MME_v2	3	155084189	G	A	2.14e-08	1.15 (1.1-1.21)	2.2e-11	1.16[1.11–1.21]	0.026	0.2188	0.64[0.32-1.30]	0.0186	0.9882	0.0156	7.44[1.46-37.80]	0.0107	0.997	0.8697	0.95[0.50-1.81]	0.0174	+-	2.42e-08	1.15[1.10-1.21]	-+-	74	0.021	no	0.87	0.84[0.11-6.39]	0.0116	0.4222	0.7608	1.10 [0.60-2.03]	0.9833	++-	2.63e-08	0.87 [0.83-0.91]	-++-	62.7	0.045	no	no
chr4:993555:G:T	rs3822030	IDUA	4	993555	G	T	5.04e-10	0.95 (0.93-0.97)	8.3e-12	0.95[0.94–0.96]	0.429	0.7106	0.97[0.80-1.16]	0.4222	0.953	0.7455	1.06[0.76-1.48]	0.3724	0.9629	0.8687	0.99[0.84-1.16]	0.4104	+-	6.46e-10	0.95[0.93-0.97]	++-	0	0.812	no	0.0715	1.30[0.98-1.72]	0.5715	0.9513	0.3193	1.07 [0.93-1.23]	0.5845	++-	3.69e-10	1.05 [1.04-1.07]	+++-	0	0.588	yes	yes
chr4:11023507:C:T	rs6846529	CLNK	4	11023507	C	T	1.25e-13	1.07 (1.05-1.09)	2.2e-17	1.07[1.05–1.08]	0.283	0.5698	1.06[0.87-1.29]	0.341	0.9515	0.8902	0.98[0.71-1.35]	0.3595	0.9494	0.6772	1.04[0.88-1.22]	0.3459	-+	1.38e-13	1.07[1.05-1.09]	--+	0	0.858	no	0.5114	1..1[0.82-1.50]	0.6494	0.9477	0.9941	1.00 [0.87-1.15]	0.6529	+-+	2.16e-13	0.94 [0.92-0.95]	-+-+	0	0.638	no	no
chr4:40197226:G:C	rs2245466	RHOH	4	40197226	G	C	3.05e-07	1.05 (1.03-1.07)	1.2e-09	1.05[1.03–1.06]	0.343	0.2783	0.89[0.72-1.10]	0.4	0.8072	0.7871	1.05[0.74-1.47]	0.4404	0.8974	0.4335	0.93[0.78-1.11]	0.4111	+-	4.94e-07	1.05[1.03-1.07]	-+-	13	0.317	no	0.8463	0.97[0.70-1.34]	0.6263	0.779	0.582	1.04 [0.90-1.22]	0.5988	-+-	4.81e-07	0.96 [0.94-0.97]	--+-	0	0.512	no	yes
chr5:14724304:T:A	rs112403360	ANKH	5	14724304	A	T	3.42e-06	1.08 (1.04-1.11)	2.3e-09	1.09[1.06–1.12]	0.073	0.3209	0.80[0.51-1.25]	0.048	0.9739	0.9866	0.99[0.33-2.93]	0.0214	0.9975	0.3556	0.82[0.54-1.24]	0.0441	--	4.91e-06	1.07[1.04-1.11]	+--	0	0.42	no	0.4365	1.40[0.60-3.30]	0.0337	0.981	0.9199	0.98 [0.68-1.42]	0.0419	+--	3.74e-06	1.08 [1.04-1.11]	++--	18.4	0.299	no	yes
chr5:86927378:T:C	rs62374257	COX7C	5	86927378	C	T	1.41e-13	1.07 (1.05-1.09)	1.4e-15	1.07[1.05–1.09]	0.23	0.7365	0.96[0.77-1.20]	0.236	0.9367	0.7617	1.06[0.74-1.51]	0.2837	0.979	0.9016	0.99[0.82-1.19]	0.2495	+-	1.6e-13	1.07[1.05-1.09]	-+-	0	0.631	no	0.408	1.14[0.83-1.57]	0.2486	0.9335	0.6484	0.96 [0.82-1.13]	0.7508	-+-	1.09e-13	0.93 [0.91-0.95]	--+-	0	0.743	yes	yes
chr5:151052827:C:T	rs871269	TNIP1	5	151052827	T	C	3.42e-06	0.96 (0.94-0.98)	8.7e-09	0.96[0.95–0.97]	0.326	0.6066	1.05[0.86-1.28]	0.4244	0.9055	0.5121	0.90[0.66-1.23]	0.5147	0.9972	0.9377	1.01[0.85-1.19]	0.4509	+-	4.15e-06	0.96[0.94-0.98]	-+-	0	0.607	no	0.6648	1.07[0.79-1.45]	0.5561	0.9107	0.6267	1.04 [0.90-1.20]	0.4785	++-	5.5e-06	0.96 [0.94-0.98]	-++-	0	0.531	no	no
chr5:180201150:G:A	rs113706587	RASGEF1C	5	180201150	A	G	3.38e-12	1.1 (1.07-1.13)	2.2e-16	1.09[1.07–1.12]	0.11	0.0189	1.47[1.07-2.04]	0.0947	0.9105	0.0016	2.39[1.39-4.11]	0.0905	0.9767	0.0003	1.67[1.27-2.21]	0.0936	++	3.78e-13	1.10[1.07-1.13]	+++	81.9	0.004	yes	0.86	0.96[0.58-1.57]	0.0976	0.9152	0.0008	1.50 [1.18-1.90]	0.0947	+++	3.41e-13	1.10 [1.07-1.13]	++++	72.8	0.012	yes	yes
chr6:32615322:A:G	rs6605556	HLA-DQA1	6	32615322	G	A	1.05e-17	0.91 (0.89-0.93)	7.1e-20	0.91[0.90–0.93]	0.161	0.4837	0.91[0.70-1.19]	0.1525	0.9992	0.4362	1.16[0.80-1.69]	0.2026	0.9993	0.9037	0.99[0.79-1.23]	0.1692	+-	1.6e-17	0.91[0.89-0.93]	++-	0	0.437	no	0.9753	0.99[0.72-1.37]	0.2524	0.9994	0.539	1.06 [0.89-1.26]	0.8012	++-	1.12e-17	1.10 [1.08-1.13]	+++-	0	0.637	no	yes
chr6:41036354:G:A	rs10947943	UNC5CL	6	41036354	A	G	6.21e-06	0.95 (0.93-0.97)	1.1e-09	0.94[0.93–0.96]	0.142	0.1907	1.19[0.92-1.54]	0.1445	0.9676	0.6436	1.11[0.72-1.69]	0.1717	0.9638	0.1746	1.17[0.93-1.46]	0.1519	++	1.31e-05	0.95[0.93-0.97]	-++	40.8	0.185	no	0.8646	0.97[0.71-1.34]	0.2401	0.9651	0.2233	1.12 [0.94-1.33]	0.1842	+++	1.51e-05	0.95 [0.93-0.97]	-+++	18.8	0.296	no	no
chr6:41161469:C:T	rs143332484	TREM2 R62H	6	41161469	T	C	6.04e-19	1.4 (1.3-1.5)	2.8e-25	1.41[1.32–1.50]	0.013	0.6673	1.24[0.47-3.24]	0.0109	0.8057	0.4383	2.21[0.30-16.39]	0.0067	0.8052	0.4695	1.38[0.58-3.28]	0.0101	++	4.33e-19	1.40[1.30-1.50]	+++	0	0.877	yes	0.7922	1.16[0.39-3.42]	0.0174	0.881	0.8945	1.05 [0.52-2.13]	0.0139	-+?	7.65e-19	1.39 [1.29-1.50]	+-+?	0	0.65	no	no
chr6:41161514:C:T	rs75932628	TREM2 R47H	6	41161514	T	C	1.39e-27	2.42 (2.06-2.84)	2.5e-37	2.39[2.09–2.73]	0.003	0.228	3.63[0.45-29.54]	0.0024	0.8047	0.3388	3.31[0.29-38.30]	0.004	0.9932	0.1241	3.49[0.71-17.16]	0.0031	++	4.98e-28	2.43[2.07-2.85]	+++	0	0.903	yes	0.2599	2.44[0.52-11.46]	0.0115	0.963	0.0431	3.55 [1.04-12.10]	0.0084	++?	2.27e-28	2.44 [2.08-2.85]	+++?	0	0.833	yes	yes
chr6:41181270:A:G	rs60755019	TREM2L	6	41181270	G	A	1.78e-07	1.55 (1.32-1.83)	2.1e-08	1.55[1.33–1.80]	0.004	0.8773	0.95[0.46-1.92]	0.019	0.9341	0.0159	2.41[1.18-4.92]	0.0439	0.9529	0.1116	1.51[0.91-2.49]	0.0314	+-	4.91e-08	1.55[1.32-1.81]	-+-	39.8	0.19	yes	0.0103	2.52[1.24-5.12]	0.0484	0.9609	0.0049	0.56 [0.38-0.84]	0.9623	-+-	3.69e-09	0.63 [0.54-0.74]	--+-	37.2	0.189	yes	yes
chr6:47517390:C:T	rs7767350	CD2AP	6	47517390	T	C	5.05e-12	1.06 (1.05-1.08)	7.9e-22	1.08[1.06–1.09]	0.271	0.7058	0.96[0.77-1.20]	0.2288	0.9855	0.0754	1.37[0.97-1.94]	0.2451	0.9916	0.5198	1.06[0.88-1.28]	0.2336	-+	3.87e-12	1.06[1.05-1.08]	+-+	30.8	0.236	yes	0.8001	0.95[0.67-1.36]	0.1831	0.9662	0.4943	1.06 [0.90-1.25]	0.2211	+-+	3.77e-12	1.06 [1.05-1.08]	++-+	0	0.407	yes	yes
chr6:114291731:T:C	rs785129	HS3STS	6	114291731	T	C	2.94e-07	1.05 (1.03-1.06)	2.4e-09	1.04[1.03–1.06]	0.35	0.0301	1.24[1.02-1.51]	0.4038	0.9263	0.1707	0.80[0.58-1.10]	0.4711	0.9568	0.2557	1.10[0.93-1.30]	0.4221	+-	1.61e-07	1.05[1.03-1.06]	++-	64.7	0.059	yes	0.8079	1.04[0.77-1.41]	0.5162	0.8843	0.4182	1.06 [0.92-1.22]	0.4384	-+-	1.88e-07	1.05 [1.03-1.06]	+-+-	50.6	0.108	yes	no
chr7:7817263:T:C	rs6943429	UMAD1	7	7817263	T	C	2.98e-07	1.04 (1.03-1.06)	1e-10	1.05[1.03–1.06]	0.42	0.475	1.07[0.89-1.29]	0.4698	0.9519	0.6951	1.07[0.77-1.47]	0.4392	0.9322	0.4153	1.07[0.91-1.26]	0.462	++	2.28e-07	1.04[1.03-1.06]	+++	0	0.958	yes	0.987	1.00[0.75-1.34]	0.4182	0.956	0.4497	1.05 [0.92--1.21]	0.494	+++	2.31e-07	1.04 [1.03-1.06]	++++	0	0.989	yes	no
chr7:8204382:T:C	rs10952097	ICA1	7	8204382	T	C	3.28e-07	1.07 (1.04-1.1)	6.8e-09	1.07[1.05–1.10]	0.114	0.0635	1.39[0.98-1.96]	0.1191	0.6481	0.7512	0.91[0.51-1.62]	0.1111	0.7112	0.1532	1.24[0.92-1.67]	0.117	+-	1.68e-07	1.07[1.05-1.10]	++-	17.4	0.298	yes	0.5099	1.19[0.71-1.98]	0.8302	0.5581	0.2583	1.16 [0.90-1.48]	0.1322	-+-	1.84e-07	1.07 [1.05-1.10]	+-+-	0	0.455	yes	no
chr7:12229967:C:A	rs13237518	TMEM106B	7	12229967	A	C	5.13e-07	0.96 (0.94-0.98)	4.9e-11	0.96[0.94–0.97]	0.411	0.4708	0.93[0.78-1.12]	0.4953	0.9917	0.601	1.09[0.79-1.50]	0.5112	0.9915	0.7166	0.97[0.83-1.14]	0.4993	-+	4.48e-07	0.96[0.94-0.98]	--+	0	0.711	yes	0.4814	0.91[0.69-1.19]	0.4989	0.9877	0.5123	0.90 [0.84-1.09]	0.4992	--+	3.8e-07	0.96 [0.94-0.97]	---+	0	0.853	yes	yes
chr7:28129126:GTCTT:G	rs1160871	JAZF1	7	28129126	G	GTCTT	1.12e-07	0.95 (0.93-0.97)	9.8e-09	0.95[0.93–0.97]	0.222	0.8432	1.02[0.84-1.24]	0.3565	0.9942	0.8005	1.04[0.76-1.42]	0.4377	0.9855	0.7623	1.03[0.87-1.21]	0.3798	++	1.46e-07	0.95[0.93-0.97]	-++	0	0.648	no	0.9591	1.01[0.76-1.34]	0.4453	0.9873	0.7634	1.02 [0.89-1.18]	0.3988	+++	1.63e-07	0.95 [0.93-0.97]	-+++	0	0.779	no	no
chr7:37844191:T:C	rs6966331	EPDR1	7	37844191	T	C	4.81e-06	0.96 (0.95-0.98)	4.6e-10	0.96[0.94–0.97]	0.349	0.404	1.08[0.90-1.31]	0.458	0.987	0.7653	0.95[0.69-1.32]	0.5433	0.9922	0.5705	1.05[0.89-1.24]	0.48	+-	6.55e-06	0.96[0.95-0.98]	-+-	0	0.469	no	0.456	1.12[0.83-1.50]	0.4643	0.9657	0.8666	1.01 [0.88-1.17]	0.4951	-+-	5.72e-06	0.96 [0.95-0.98]	--+-	0	0.654	no	yes
chr7:54873635:C:T	rs76928645	SEC61G	7	54873635	T	C	1.51e-08	0.93 (0.9-0.95)	1.6e-10	0.93[0.91–0.95]	0.103	0.7903	0.95[0.68-1.34]	0.0779	0.9514	0.8923	1.04[0.56-1.96]	0.068	0.9766	0.8657	0.97[0.72-1.32]	0.0756	-+	1.73e-08	0.93[0.90-0.95]	--+	0	0.92	no	0.8355	0.95[0.57-1.58]	0.0812	0.9669	0.5811	0.93 [0.72-1.20]	0.0772	--+	1.42e-08	0.93 [0.90-0.95]	---+	0	0.946	yes	yes
chr7:100334426:C:T	rs7384878	SPDYE3	7	100334426	C	T	2.13e-18	0.93 (0.91-0.94)	1.1e-26	0.92[0.91–0.94]	0.31	0.2589	0.89[0.72-1.09]	0.3946	0.9423	0.5043	0.90[0.65-1.23]	0.4976	0.9802	0.19	0.89[0.75-1.06]	0.4252	++	1.43e-18	0.93[0.91-0.94]	+++	0	0.907	yes	0.7259	0.95[0.72-1.26]	0.4879	0.9645	0.2559	1.09 [0.94-1.26]	0.5476	+++	1.62e-18	1.08 [1.06-1.10]	++++	0	0.931	yes	no
chr7:143413669:G:A	rs11771145	EPHA1	7	143413669	A	G	1.29e-12	0.94 (0.93-0.96)	3.3e-14	0.95[0.93–0.96]	0.348	0.338	0.91[0.75-1.10]	0.3181	0.9936	0.6052	1.09[0.78-1.53]	0.2946	0.9986	0.5684	0.95[0.80-1.13]	0.3122	-+	1.02e-12	0.94[0.93-0.96]	--+	0	0.645	yes	0.3311	0.85[0.62-1.17]	0.2979	0.9904	0.3553	0.93 [0.81-1.08]	0.3086	--+	7.79e-13	0.94 [0.93-0.96]	---+	0	0.78	yes	yes
chr8:11844613:G:C	rs1065712	CTSB	8	11844613	C	G	5.46e-09	1.11 (1.07-1.16)	1.9e-09	1.09[1.06–1.12]	0.053	0.8055	1.06[0.67-1.68]	0.0415	0.9411	0.0755	0.29[0.08-1.13]	0.0244	0.9449	0.7358	0.93[0.60-1.43]	0.0397	+-	6.83e-09	1.11[1.07-1.15]	++-	47.1	0.151	no	0.996	1.00[0.32-3.15]	0.0175	0.8564	0.8052	0.95 [0.63-1.42]	0.0365	++-	6.72e-09	1.11 [1.07-1.15]	+++-	20.6	0.286	no	yes
chr8:27362470:C:T	rs73223431	PTK2B	8	27362470	T	C	5.34e-15	1.07 (1.05-1.09)	4e-22	1.07[1.06–1.08]	0.369	0.2676	0.89[0.73-1.09]	0.3149	0.9858	0.2032	0.79[0.54-1.14]	0.257	0.9987	0.1127	0.87[0.72-1.03]	0.3013	--	2.34e-14	1.07[1.05-1.08]	+--	64.4	0.06	no	0.8306	1.03[0.76-1.42]	0.2896	0.9855	0.3755	0.93 [0.80-1.09]	0.2981	+--	1.74e-14	1.07 [1.05-1.08]	++--	48.5	0.121	no	yes
chr8:27607795:T:C	rs11787077	CLU	8	27607795	T	C	2.43e-33	0.9 (0.89-0.92)	1.7e-44	0.91[0.90–0.92]	0.392	0.8524	0.98[0.81-1.19]	0.3509	0.9861	0.0196	0.67[0.48-0.94]	0.3484	0.9662	0.1875	0.89[0.76-1.06]	0.3503	--	6.23e-34	0.90[0.89-0.92]	---	46.9	0.152	yes	0.7413	0.95[0.70-1.29]	0.6782	0.9711	0.3409	0.93 [0.81-1.08]	0.3429	+--	1.02e-33	0.91 [0.89-0.92]	-+--	38.4	0.181	yes	no
chr8:144103704:G:A	rs34173062	SHARPIN	8	144103704	A	G	2.93e-12	1.12 (1.09-1.16)	1.7e-16	1.13[1.09–1.16]	0.081	0.1314	0.76[0.53-1.09]	0.0866	0.784	0.5872	0.83[0.42-1.64]	0.0612	0.9127	0.1123	0.77[0.56-1.06]	0.0811	--	1.09e-11	1.12[1.08-1.15]	+--	61.8	0.073	no	0.1099	1.81[0.87-3.72]	0.0529	0.766	0.4133	0.89 [0.66-1.18]	0.0761	+--	7.11e-12	1.12 [1.08-1.15]	++--	54.2	0.088	no	yes
chr9:104903697:C:G	rs1800978	ABCA1	9	104903697	G	C	1.61e-08	1.07 (1.05-1.1)	1.6e-09	1.06[1.04–1.08]	0.13	0.4886	0.91[0.70-1.18]	0.1474	0.9919	0.5165	0.85[0.52-1.38]	0.131	0.9839	0.3589	0.90[0.71-1.13]	0.1437	++	3.53e-08	1.07[1.04-1.09]	-++	12.1	0.321	no	0.0793	1.44[0.96-2.15]	0.1566	0.9843	0.8081	0.98 [0.80-1.19]	0.8527	-++	1.86e-08	0.93 [0.91-0.96]	--++	37.2	0.189	no	yes
chr10:11676714:A:G	rs7912495	USP6NL	10	11676714	G	A	2.87e-12	1.06 (1.04-1.08)	9.7e-19	1.06[1.05–1.08]	0.462	0.7278	1.03[0.86-1.25]	0.4877	0.9464	0.6723	1.07[0.79-1.45]	0.4962	0.9736	0.6046	1.04[0.89-1.23]	0.49	--	2.7e-12	1.06[1.04-1.08]	---	0	0.969	yes	0.8823	1.02[0.76-1.37]	0.4862	0.936	0.5733	0.96 [0.84-1.10]	0.511	---	2.67e-12	0.94 [0.93-0.96]	----	0	0.992	yes	yes
chr10:60025170:T:G	rs7068231	ANK3	10	60025170	T	G	6.79e-09	0.95 (0.94-0.97)	3.3e-13	0.95[0.94–0.96]	0.403	0.433	0.93[0.77-1.12]	0.5064	0.9511	0.8993	1.02[0.74-1.41]	0.5855	0.9688	0.5386	0.95[0.81-1.12]	0.5263	-+	5.54e-09	0.95[0.94-0.97]	--+	0	0.881	yes	0.8409	1.03[0.77-1.39]	0.4215	0.9444	0.5463	0.96[0.83-1.10]	0.5398	--+	5.6e-09	0.95 [0.94-0.97]	---+	0	0.961	yes	no
chr10:80494228:C:T	rs6586028	TSPAN14	10	80494228	C	T	1.33e-14	0.92 (0.91-0.94)	2e-19	0.93[0.91–0.94]	0.196	0.7015	0.95[0.72-1.24]	0.1625	0.8928	0.0193	1.72[1.09-2.70]	0.1285	0.9961	0.3835	1.11[0.88-1.40]	0.1535	+-	3.58e-14	0.93[0.91-0.94]	++-	72.3	0.027	no	0.1978	1.34[0.86-2.09]	0.8814	0.8898	0.9649	1.00 [0.81-1.22]	0.855	++-	2.22e-14	1.08 [1.06-1.10]	+++-	64.1	0.039	no	yes
chr10:96266650:G:A	rs6584063	BLNK	10	96266650	G	A	1.84e-07	0.89 (0.86-0.93)	6.7e-11	0.89[0.86–0.92]	0.043	0.3556	0.75[0.41-1.38]	0.0397	0.5908	0.0626	2.60[0.95-7.09]	0.0432	0.5327	0.8644	1.05[0.62-1.76]	0.0406	+-	2.06e-07	0.90[0.86-0.93]	++-	56.9	0.098	no	0.547	0.73[0.26-2.02]	0.9457	0.4406	0.6324	0.90 [0.57-1.41]	0.9561	-+-	2.5e-07	1.12 [1.07-1.16]	+-+-	45	0.141	no	no
chr10:122413396:A:G	rs7908662	PLEKHA1	10	122413396	G	A	3.3e-06	0.96 (0.95-0.98)	2.6e-09	0.96[0.95–0.97]	0.467	0.5659	1.06[0.88-1.27]	0.5353	0.9738	0.0238	0.69[0.50-0.95]	0.6243	0.9756	0.5215	0.95[0.81-1.12]	0.5578	-+	2.52e-06	0.96[0.95-0.98]	+-+	60.5	0.08	yes	0.7145	1.05[0.79-1.40]	0.5994	0.9643	0.5772	1.04 [0.91-1.19]	0.4305	+-+	2.6e-06	1.04 [1.02-1.05]	++-+	41.5	0.163	yes	no
chr11:47370397:G:A	rs10437655	SPI1	11	47370397	A	G	8.21e-12	1.06 (1.04-1.08)	5.3e-14	1.06[1.04–1.07]	0.399	0.7454	1.03[0.85-1.25]	0.345	0.9932	0.1689	1.26[0.91-1.74]	0.3141	0.9951	0.3286	1.09[0.92-1.28]	0.3371	++	5.9e-12	1.06[1.04-1.08]	+++	0	0.566	yes	0.2669	0.84[0.62-1.14]	0.2973	0.9888	0.751	1.02 [0.89-1.18]	0.3268	-++	9.67e-12	1.06 [1.04-1.07]	+-++	5.3	0.366	no	no
chr11:60254475:G:A	rs1582763	MS4A4A	11	60254475	A	G	1.65e-24	0.92 (0.9-0.93)	3.7e-42	0.91[0.90–0.92]	0.371	0.6832	1.04[0.86-1.26]	0.4028	0.9888	0.6789	0.94[0.68-1.28]	0.4387	1	0.8927	1.01[0.86-1.19]	0.4124	+-	2.64e-24	0.92[0.90-0.93]	-+-	0	0.43	no	0.8953	1.02[0.75-1.38]	0.3423	0.9732	0.8215	1.02 [0.88-1.17]	0.3948	++-	3.6e-24	0.92 [0.90-0.93]	-++-	0	0.504	no	no
chr11:86157598:T:C	rs3851179	EED	11	86157598	T	C	6.5e-36	0.9 (0.89-0.91)	3e-48	0.9[0.89–0.92]	0.358	0.983	1.00[0.83-1.21]	0.3823	0.9995	0.8535	1.03[0.75-1.40]	0.4508	0.9996	0.9093	1.01[0.86-1.19]	0.4007	++	1.08e-35	0.90[0.89-0.92]	-++	0	0.376	no	0.8722	0.98[0.72-1.32]	0.6414	1	0.7726	1.02 [0.89-1.17]	0.3899	+++	1.88e-35	0.90 [0.89-0.92]	-+++	6.4	0.361	no	no
chr11:121482368:T:G	rs74685827	SORL1	11	121482368	G	T	8.63e-11	1.22 (1.15-1.29)	2.8e-11	1.19[1.13–1.25]	0.019	0.9543	0.97[0.37-2.56]	0.0104	0.8691	0.2011	7.14[0.35-145.21]	0.0054	0.7361	0.736	1.17[0.47-2.95]	0.0099	+-	8.58e-11	1.22[1.15-1.29]	-+-	0	0.465	yes	0.786	1.26[0.24-6.68]	0.0082	0.8631	0.9543	1.03 [0.39-2.71]	0.9896	?+?	1.01e-10	0.82 [0.78-0.87]	-?+?	0	0.65	no	no
chr11:121564878:T:C	rs11218343	SORL1_v2	11	121564878	C	T	1.01e-14	0.85 (0.81-0.88)	1.4e-21	0.84[0.81–0.87]	0.039	0.872	1.04[0.67-1.60]	0.0454	0.9932	0.5856	0.76[0.28-2.04]	0.0292	0.9839	0.9418	0.99[0.66-1.47]	0.0428	-+	1.42e-14	0.85[0.81-0.89]	+-+	0	0.651	no	0.5986	0.80[0.35-1.82]	0.036	0.9168	0.6446	1.09 [0.76-1.55]	0.9587	+-+	1.08e-14	1.18 [1.13-1.23]	++-+	0	0.789	no	yes
chr12:113281983:T:C	rs6489896	TPCN1	12	113281983	C	T	2.54e-06	1.08 (1.04-1.11)	1.8e-09	1.08[1.05–1.10]	0.076	0.9332	1.01[0.72-1.44]	0.0729	0.935	0.3342	1.32[0.75-2.32]	0.0759	0.9826	0.5633	1.09[0.81-1.47]	0.0737	--	2.09e-06	1.08[1.04-1.11]	---	0	0.736	yes	0.7024	1.12[0.62-2.05]	0.0621	0.9066	0.496	0.91 [0.70-1.19]	0.9288	---	1.97e-06	0.93 [0.90-0.96]	----	0	0.89	yes	yes
chr14:52924962:A:G	rs17125924	FERMT2	14	52924962	G	A	5.82e-10	1.09 (1.06-1.12)	8.3e-16	1.1[1.07–1.12]	0.089	0.2068	1.24[0.89-1.74]	0.0766	0.9836	0.8854	1.05[0.55-2.00]	0.0627	1	0.2356	1.20[0.89-1.62]	0.0737	--	3.23e-10	1.09[1.06-1.12]	---	0	0.75	yes	0.9878	1.00[0.63-1.60]	0.1022	0.9776	0.2295	0.86 [0.67-1.10]	0.9171	---	2.98e-10	0.91 [0.89-0.94]	----	0	0.902	yes	yes
chr14:92464917:G:A	rs7401792	SLC24A4	14	92464917	G	A	7.15e-06	1.04 (1.02-1.06)	4.8e-08	1.04[1.02–1.05]	0.371	0.3672	1.09[0.90-1.33]	0.4191	0.9603	0.4385	1.14[0.82-1.57]	0.4153	0.9432	0.2416	1.10[0.94-1.30]	0.4181	--	4.99e-06	1.04[1.02-1.06]	---	0	0.757	yes	0.0917	1.29[0.96-1.75]	0.6651	0.9465	0.7336	0.98 [0.85-1.12]	0.6042	+--	7.47e-06	0.96 [0.95-0.98]	-+--	0	0.398	no	no
chr14:92472511:G:A	rs12590654	SLC24A4_v2	14	92472511	A	G	2.08e-15	0.93 (0.92-0.95)	4.2e-21	0.93[0.92–0.95]	0.328	0.5809	1.06[0.86-1.30]	0.2949	0.9585	0.2633	0.82[0.58-1.16]	0.3302	0.9503	0.9217	0.99[0.83-1.18]	0.3042	+-	2.05e-15	0.93[0.92-0.95]	-+-	0	0.37	yes	0.7112	0.94[0.68-1.30]	0.268	0.9573	0.764	0.98 [0.84-1.14]	0.2944	-+-	1.88e-15	0.93 [0.92-0.95]	--+-	0	0.575	yes	yes
chr14:105761758:A:G	rs7157106	IGH_gene_cluster	14	105761758	A	G	1.46e-07	1.06 (1.04-1.08)	2e-08	1.05[1.03–1.07]	0.36	NA	NA	NA	NA	0.3572	1.21[0.81-1.82]	0.5953	0.6195	0.3572	1.21[0.81-1.82]	0.5953	?+	1.09e-07	1.06[1.04-1.08]	+?+	0	0.517	yes	-	-	-	0.4006	0.3572	1.21 [0.81-1.82]	0.5953	??+	1.09e-07	1.06 [1.04-1.08]	+??+	0	0.517	yes	no
chr14:106665591:G:A	rs10131280	IGH_gene_cluster.2	14	106665591	A	G	1.98e-07	0.94 (0.91-0.96)	4.3e-10	0.94[0.92–0.96]	0.133	0.0384	0.72[0.53-0.98]	0.1388	0.8112	0.4174	0.83[0.53-1.30]	0.1477	0.9714	0.0302	0.75[0.58-0.97]	0.1416	--	7.98e-08	0.93[0.91-0.96]	---	33.2	0.224	yes	0.1815	1.38[0.86-2.22]	0.1553	0.7243	0.2105	0.87 [0.70-1.08]	0.1451	+--	1.22e-07	0.94 [0.91-0.96]	-+--	43.9	0.148	yes	no
chr15:50701814:A:G	rs8025980	SPPL2A	15	50701814	G	A	6.09e-06	0.96 (0.95-0.98)	1.3e-08	0.96[0.94–0.97]	0.345	0.8205	0.98[0.81-1.19]	0.3311	0.9799	0.6933	0.94[0.67-1.30]	0.3293	0.9892	0.693	0.97[0.82-1.14]	0.3306	++	5.17e-06	0.96[0.95-0.98]	+++	0	0.973	yes	0.113	1.27[0.95-1.71]	0.3489	0.9661	0.7021	0.97 [0.84-1.12]	0.6644	-++	7.99e-06	1.04 [1.02-1.06]	+-++	0	0.426	no	no
chr15:58764824:T:A	rs602602	MINDY2	15	58764824	A	T	9.65e-12	0.94 (0.92-0.96)	2.1e-15	0.94[0.93–0.96]	0.28	0.7033	0.96[0.77-1.19]	0.3097	0.9526	0.2054	0.82[0.59-1.12]	0.387	0.9836	0.3013	0.91[0.76-1.09]	0.3348	--	5.9e-12	0.94[0.92-0.96]	---	0	0.668	yes	0.8662	0.98[0.73-1.30]	0.407	0.9815	0.3684	0.93 [0.81-1.08]	0.3574	---	6.34e-12	0.94 [0.92-0.96]	----	0	0.813	yes	no
chr15:63277703:C:T	rs117618017	APH1B	15	63277703	T	C	1.75e-21	1.12 (1.09-1.15)	2.2e-25	1.11[1.09–1.13]	0.144	0.9781	1.00[0.74-1.35]	0.1089	0.8942	0.7591	1.08[0.66-1.75]	0.1125	0.9953	0.8894	1.02[0.79-1.32]	0.1099	-+	2.81e-21	1.12[1.09-1.15]	+-+	0	0.744	no	0.2691	1.33[0.80-2.21]	0.102	0.8476	0.5325	1.07 [0.86-1.35]	0.108	+-+	1.92e-21	1.12 [1.09-1.15]	++-+	0	0.823	no	yes
chr15:64131307:G:A	rs3848143	SNX1	15	64131307	G	A	1.1e-06	1.05 (1.03-1.07)	8.4e-11	1.05[1.04–1.07]	0.22	0.9969	1.00[0.81-1.23]	0.3089	0.9633	0.1521	1.27[0.91-1.77]	0.3667	0.9844	0.4449	1.07[0.90-1.28]	0.3252	--	8.52e-07	1.05[1.03-1.07]	---	0	0.468	yes	0.891	0.98[0.72-1.32]	0.6412	0.9405	0.4746	0.95 [0.82-1.10]	0.6652	---	8.64e-07	0.95 [0.93-0.97]	----	0	0.668	yes	no
chr15:78936857:A:G	rs12592898	CTSH	15	78936857	A	G	1.28e-06	0.94 (0.92-0.97)	4.2e-09	0.94[0.92–0.96]	0.133	0.2697	0.84[0.61-1.15]	0.1097	0.8461	0.995	1.00[0.53-1.88]	0.078	0.8844	0.3223	0.87[0.65-1.15]	0.1034	--	8.65e-07	0.94[0.92-0.96]	---	0	0.753	yes	0.7473	0.91[0.52-1.60]	0.8969	0.7304	0.4219	0.90 [0.71-1.16]	0.1033	+--	9.17e-07	0.94 [0.92-0.96]	-+--	0	0.874	yes	no
chr16:30010081:C:T	rs1140239	DOC2A	16	30010081	T	C	4.61e-12	0.94 (0.93-0.96)	2.6e-13	0.94[0.93–0.96]	0.379	0.0342	0.81[0.66-0.98]	0.3046	0.9834	0.8423	0.96[0.67-1.39]	0.2451	0.9915	0.0505	0.84[0.71-1.00]	0.2911	--	1.92e-12	0.94[0.93-0.96]	---	14.7	0.309	yes	0.2945	0.85[0.62-1.15]	0.323	0.9549	0.0679	0.87 [0.75-1.01]	0.3	---	1.84e-12	0.94 [0.93-0.96]	----	0	0.502	yes	yes
chr16:31111250:C:T	rs889555	BCKDK	16	31111250	T	C	1.03e-09	0.95 (0.93-0.96)	2e-11	0.95[0.94–0.97]	0.281	0.3105	0.90[0.74-1.10]	0.2974	0.9571	0.5789	1.10[0.79-1.53]	0.3325	0.9962	0.566	0.95[0.80-1.13]	0.307	-+	9.03e-10	0.95[0.93-0.96]	--+	0	0.604	yes	0.4716	0.89[0.65-1.22]	0.2809	0.9221	0.4261	0.94 [0.81-1.09]	0.3003	--+	7.74e-10	0.95 [0.93-0.96]	---+	0	0.787	yes	yes
chr16:70660097:C:A	rs4985556	IL34	16	70660097	A	C	5.65e-06	1.06 (1.03-1.09)	6e-10	1.07[1.05–1.09]	0.115	0.995	1.00[0.70-1.43]	0.0832	0.9035	0.3135	1.37[0.74-2.50]	0.0695	0.9976	0.6083	1.08[0.80-1.47]	0.0797	++	4.98e-06	1.06[1.03-1.09]	+++	0	0.68	yes	0.1253	1.62[0.87-3.01]	0.0638	0.8864	0.2883	1.16 [0.88-1.52]	0.0762	+++	3.88e-06	1.06 [10.3-1.09]	++++	0	0.574	yes	yes
chr16:79574511:T:C	rs450674	MAF	16	79574511	C	T	1.07e-07	0.96 (0.94-0.97)	3.2e-08	0.96[0.95–0.98]	0.373	0.1231	0.85[0.69-1.04]	0.2936	0.9459	0.8647	1.03[0.73-1.44]	0.309	0.9643	0.2188	0.90[0.75-1.07]	0.2978	+-	6.72e-08	0.96[0.94-0.97]	++-	0	0.493	yes	0.6058	0.92[0.66-1.27]	0.2703	0.9483	0.1865	1.11 [0.95-1.29]	0.7093	++-	6e-08	1.05 [1.03-1.06]	+++-	0	0.691	yes	yes
chr16:81739398:G:A	rs12446759	PLCG2	16	81739398	G	A	3.6e-12	0.94 (0.93-0.96)	1.2e-13	0.95[0.94–0.96]	0.403	0.0072	0.76[0.63-0.93]	0.4384	0.9007	0.5521	1.10[0.80-1.51]	0.3783	0.9853	0.0498	0.85[0.72-1.00]	0.4215	+-	8.89e-13	0.94[0.93-0.96]	++-	62.4	0.07	yes	0.0334	1.38[1.03-1.86]	0.5842	0.9124	0.0012	1.27 [1.10-1.46]	0.58	+-+	2.63e-13	1.06 [1.05-1.08]	+++-	75	0.007	yes	yes
chr16:81908423:C:G	rs72824905	PLCG2_P522A	16	81908423	G	C	2.66e-10	0.74 (0.67-0.81)	8.5e-12	0.74[0.68–0.81]	0.008	0.2917	0.35[0.05-2.49]	0.0049	0.7562	NA	NA	NA	NA	0.2917	0.35[0.05-2.49]	0.0049	+?	1.98e-10	0.73[0.67-0.81]	++?	0	0.453	yes	0.1562	0.04[0.00-3.52]	0.0043	0.7847	0.2917	2.90 [0.40-20.93]	0.9951	?+?	1.98e-10	1.36 [1.24-1.50]	+?+?	0	0.453	yes	no
chr16:86420604:T:A	rs16941239	FOXF1	16	86420604	A	T	2.93e-06	1.13 (1.07-1.19)	1.3e-08	1.13[1.08–1.17]	0.029	0.3007	1.25[0.82-1.89]	0.055	0.9193	0.117	0.56[0.28-1.15]	0.0652	0.9809	0.9173	1.02[0.71-1.46]	0.0576	+-	3.46e-06	1.12[1.07-1.18]	++-	47.5	0.149	no	0.3437	1.46[0.67-3.20]	0.043	0.8149	0.6095	1.09 [0.79-1.50]	0.0546	++-	2.67e-06	1.13 [1.07-1.18]	+++-	28.1	0.244	yes	yes
chr16:90103687:G:A	rs56407236	PRDM7	16	90103687	A	G	1.28e-11	1.12 (1.08-1.15)	6.5e-15	1.11[1.08–1.14]	0.069	0.0771	0.68[0.45-1.04]	0.0661	0.8383	0.3961	0.76[0.40-1.44]	0.0676	0.9928	0.0519	0.71[0.50-1.00]	0.0666	--	5.05e-11	1.11[1.08-1.15]	+--	69.4	0.038	no	0.1541	0.67[0.38-1.16]	0.075	0.905	0.0206	0.71 [0.53-0.95]	0.0693	---	9.32e-11	1.11 [1.08-1.15]	+---	67.8	0.025	no	no
chr17:1728046:TGAG:T	rs35048651	WDR81	17	1728046	T	TGAG	4.79e-07	1.05 (1.03-1.07)	7.7e-11	1.06[1.04–1.08]	0.214	0.9167	1.01[0.81-1.26]	0.2135	0.98	0.7728	1.05[0.73-1.52]	0.2324	0.9888	0.8102	1.02[0.85-1.24]	0.2187	++	4.74e-07	1.05[1.03-1.07]	+++	0	0.941	yes	0.4421	0.87[0.62-1.23]	0.2012	0.9711	0.8712	1.01 [0.86-1.19]	0.2141	-++	5.13e-07	1.05 [1.03-1.07]	+-++	0	0.964	no	no
chr17:5233752:G:A	rs7225151	SCIMP	17	5233752	A	G	2.6e-12	1.09 (1.06-1.12)	4.1e-13	1.08[1.05–1.10]	0.124	0.6568	0.93[0.66-1.30]	0.0807	0.9824	0.5689	1.17[0.68-2.02]	0.088	0.9998	0.9383	0.99[0.74-1.32]	0.0827	-+	2.83e-12	1.09[1.06-1.11]	+-+	0	0.621	no	0.0917	0.60[0.33-1.09]	0.0654	0.9778	0.3394	0.88 [0.68-1.14]	0.0791	--+	5.33e-12	1.09 [1.06-1.11]	+--+	49.4	0.115	no	no
chr17:18156140:G:A	rs2242595	MYO15A	17	18156140	A	G	4.55e-06	0.94 (0.92-0.97)	1.1e-09	0.94[0.92–0.96]	0.112	0.8046	0.97[0.76-1.24]	0.1798	0.987	0.0064	0.59[0.40-0.86]	0.2856	0.9897	0.0908	0.84[0.68-1.03]	0.2112	--	1.94e-06	0.94[0.92-0.96]	---	66	0.053	yes	0.5981	1.09[0.79-1.50]	0.2787	0.9637	0.419	0.93 [0.79-1.11]	0.2334	+--	3.19e-06	0.94 [0.92-0.97]	-+--	61.8	0.049	yes	no
chr17:44352876:C:T	rs5848	GRN	17	44352876	T	C	1.76e-12	1.07 (1.05-1.09)	2.4e-20	1.07[1.06–1.09]	0.289	0.6013	1.06[0.85-1.32]	0.2628	0.9183	0.0075	1.68[1.15-2.46]	0.2206	0.9444	0.072	1.19[0.98-1.44]	0.2521	++	8.11e-13	1.07[1.05-1.09]	+++	63.5	0.065	yes	0.4728	1.14[0.79-1.65]	0.2122	0.9003	0.08	1.16 [0.98-1.37]	0.2424	+++	7.54e-13	1.07 [1.05-1.09]	++++	45.3	0.14	yes	yes
chr17:46779275:G:C	rs199515	MAPT	17	46779275	G	C	5.97e-09	0.94 (0.93-0.96)	9.3e-13	0.94[0.93–0.96]	0.219	0.9145	0.99[0.78-1.25]	0.1934	0.9991	0.8828	1.03[0.68-1.56]	0.1587	1	0.9835	1.00[0.81-1.22]	0.1849	+-	6.88e-09	0.94[0.93-0.96]	++-	0	0.854	no	0.62	0.90[0.58-1.38]	0.8693	0.9969	0.6713	0.96 [0.80-1.15]	0.8266	-+-	9.49e-09	1.06 [1.04-1.08]	+-+-	0	0.601	no	no
chr17:58332680:A:G	rs2526377	TSPOAP1	17	58332680	G	A	4.11e-08	0.96 (0.94-0.97)	1.6e-12	0.95[0.94–0.97]	0.445	0.7215	0.96[0.79-1.18]	0.4394	0.8945	0.451	1.13[0.82-1.56]	0.4447	0.9155	0.9268	1.01[0.85-1.19]	0.4409	+-	4.29e-08	0.96[0.94-0.97]	++-	0	0.587	no	0.8054	0.96[0.71-1.30]	0.5307	0.8793	0.68	1.03 [0.89-1.19]	0.5346	++-	3.32e-08	1.05 [1.03-1.06]	+++-	0	0.694	yes	yes
chr17:63471557:C:T	rs4277405	ACE	17	63471557	C	T	7.24e-16	0.93 (0.92-0.95)	8.8e-20	0.94[0.93–0.95]	0.384	0.4003	0.92[0.76-1.12]	0.3396	0.9994	0.5786	1.10[0.78-1.56]	0.29	0.9958	0.6396	0.96[0.81-1.14]	0.328	+-	8.77e-16	0.94[0.92-0.95]	++-	0	0.638	no	0.1592	1.24[0.92-1.67]	0.6567	0.9974	0.1576	1.11 [0.96-1.28]	0.6679	++-	3.81e-16	1.07 [1.05-1.09]	+++-	2.6	0.379	yes	yes
chr17:49219935:T:C	rs616338	ABI3	17	49219935	T	C	5.38e-13	1.34 (1.24-1.45)	2.8e-14	1.32[1.23–1.42]	0.012	0.0113	4.38[1.40-13.74]	0.0197	0.388	NA	NA	NA	NA	0.0113	4.38[1.40-13.74]	0.0197	+?	1.64e-13	1.35[1.25-1.46]	++?	75.6	0.043	yes	-	-	-	0.231	0.0113	4.8 [1.40-13..74]	0.0197	?+?	1.64e-13	1.35 [1.25-1.46]	+?+?	75.6	0.043	yes	no
chr19:1050875:A:G	rs12151021	ABCA7	19	1050875	A	G	4.09e-30	1.11 (1.09-1.13)	1.6e-37	1.1[1.09–1.12]	0.336	0.2409	1.13[0.92-1.39]	0.2932	0.9371	0.0032	1.79[1.22-2.64]	0.2081	0.9639	0.0156	1.25[1.04-1.50]	0.2744	++	9.49e-31	1.11[1.09-1.13]	+++	65.7	0.054	yes	0.547	0.90[0.64-1.27]	0.7306	0.828	0.038	1.18 [1.01-1.38]	0.2732	-++	1.21e-30	1.11 [1.09-1.13]	+-++	52.4	0.098	yes	no
chr19:1854254:G:GC	rs149080927	KLF16	19	1854254	G	GC	6.14e-09	1.05 (1.04-1.07)	5.1e-10	1.05[1.04–1.07]	0.48	0.7262	1.04[0.85-1.27]	0.5954	0.8294	0.918	1.02[0.74-1.39]	0.621	0.9666	0.7263	1.03[0.87-1.22]	0.6029	++	5.89e-09	1.05[1.04-1.07]	+++	0	0.961	yes	0.1892	0.80[0.57-1.12]	0.288	0.8732	0.5485	1.05 [0.90-1.22]	0.628	+++	5.06e-09	1.05 [1.04-1.07]	++++	0	0.984	yes	yes
chr19:49950060:C:T	rs9304690	SIGLEC11	19	49950060	T	C	6.36e-06	1.05 (1.03-1.07)	4.7e-09	1.05[1.03–1.07]	0.24	0.5147	1.08[0.86-1.35]	0.2013	0.9759	0.3892	1.21[0.78-1.87]	0.1559	0.9959	0.3298	1.10[0.90-1.35]	0.1917	++	4.06e-06	1.05[1.03-1.07]	+++	0	0.782	yes	0.5001	0.88[0.60-1.28]	0.166	0.9662	0.5956	1.05 [0.88-1.25]	0.1854	-++	4.98e-06	1.05 [1.03-1.07]	+-++	0	0.731	yes	no
chr19:54267597:C:T	rs587709	LILRB2	19	54267597	C	T	3.88e-08	1.06 (1.04-1.08)	3.6e-11	1.05[1.04–1.07]	0.325	0.0836	1.20[0.98-1.49]	0.3934	0.8413	0.5194	1.11[0.80-1.55]	0.3479	0.9527	0.0711	1.18[0.99-1.41]	0.3802	--	1.65e-08	1.06[1.04-1.08]	---	0	0.456	yes	0.8374	0.97[0.71-1.33]	0.6625	0.8939	0.1475	0.89 [0.77-1.04]	0.6314	+--	1.9e-08	0.95 [0.93-0.96]	-+--	0	0.598	yes	no
chr20:413334:A:G	rs1358782	RBCK1	20	413334	A	G	1.86e-06	0.95 (0.94-0.97)	1.6e-08	0.95[0.94–0.97]	0.246	0.3036	1.12[0.90-1.40]	0.2587	0.8762	0.61	0.89[0.57-1.39]	0.173	0.9291	0.4903	1.07[0.88-1.31]	0.2414	+-	2.92e-06	0.96[0.94-0.97]	-+-	7.3	0.34	no	0.6353	0.91[0.60-1.36]	0.8098	0.8118	0.4754	1.07 [0.89-1.27]	0.2303	++-	3.17e-06	0.96 [0.94-0.97]	-++-	0	0.5	no	no
chr20:56423488:A:G	rs6014724	CASS4	20	56423488	G	A	4.84e-16	0.89 (0.86-0.91)	4.1e-21	0.89[0.87–0.91]	0.09	0.2802	0.86[0.65-1.13]	0.1491	0.9419	0.0175	0.61[0.41-0.92]	0.2227	0.9691	0.0259	0.77[0.62-0.97]	0.1723	++	8.47e-17	0.89[0.86-0.91]	+++	39.2	0.193	yes	0.1786	0.78[0.54-1.12]	0.2073	0.9302	0.0112	1.27 [1.06-1.54]	0.8165	+++	4.48e-17	1.13 [1.10-1.16]	++++	15.9	0.312	yes	yes
chr20:63743088:T:C	rs6742	SLC2A4RG	20	63743088	T	C	2.49e-06	0.95 (0.93-0.97)	2.6e-09	0.95[0.93–0.97]	0.221	0.3875	0.89[0.68-1.16]	0.1832	0.7549	0.4584	0.83[0.51-1.35]	0.1275	0.8892	0.2645	0.87[0.69-1.11]	0.17	--	1.51e-06	0.95[0.93-0.97]	---	0	0.761	yes	0.4557	1.17[0.77-1.78]	0.8439	0.7781	0.1812	0.87 [0.71-1.07]	0.1662	---	1.29e-06	0.95 [0.93-0.97]	----	0	0.855	yes	yes
chr21:26101558:C:T	rs2154481	APP	21	26101558	C	T	1.02e-09	0.95[0.94-0.97]	1e-12	0.95[0.94–0.97]	0.476	0.7834	0.97[0.80-1.18]	0.5714	0.9632	0.8391	1.03[0.75-1.43]	0.624	0.9667	0.8929	0.99[0.84-1.17]	0.5848	+-	1.19e-09	0.95[0.94-0.97]	++-	0	0.858	no	0.3168	0.85[0.63-1.16]	0.3162	0.9592	0.564	0.96 [0.83-1.11]	0.3904	-+-	2.04e-09	1.05 [1.03-1.07]	+-+-	8.4	0.351	no	no
chr21:26775872:C:T	rs2830489	ADAMTS1	21	26775872	T	C	1.72e-09	0.95[0.93-0.96]	1.7e-10	0.95[0.94–0.97]	0.281	0.9132	1.01[0.80-1.28]	0.234	0.9647	0.7323	0.93[0.61-1.41]	0.1787	0.9999	0.9432	0.99[0.81-1.21]	0.2209	+-	2.05e-09	0.95[0.93-0.96]	-+-	0	0.846	no	0.2973	0.82[0.56-1.20]	0.1741	0.9538	0.3275	0.92 [0.77-1.09]	0.2091	-+-	1.21e-09	0.95 [0.93-0.96]	--+-	0	0.448	yes	yes

## Sheet: Supplementary Table 3
Supplementary Table 3. Improved loci in all data sets.
Results obtained with an association and fixed-effects inverse-variance-weighted meta-analysis. Effect reported by minnor allele (MAF-Allele 1). Significant after meta-analysis. OR[95% CI]: Odds Ratio [95% confidence interval], MAF: Minnor allele frequency, Rsq: Imputation quality.
							EADB stage I		EADB (Stage I+II)			Argentina Population				Chile population				Meta-analysis of Argentina and Chile populations				Meta-analysis of EADB stage I with Argentina and Chile populations						Colombia population				Meta-analysis of Colombia, Argentina and Chile populations				Meta-analysis of EADB stage I with Colombia, Argentina and Chile populations
ID	RS	Gene	Chromosome	Position	Alelle 1 (MAF)	Allele 2	P-value	OR[CI95%]	P-value	OR[CI95%]	MAF	P-value	OR[CI95%]	MAF	Rsq	P-value	OR[CI95%]	MAF	Rsq	P-value	OR[CI95%]	MAF	Direction	P-value	OR[CI95%]	Direction	HetISq	HetPVal	Improved P-value	P-value	OR[CI95%]	MAF	Rsq	P-value	OR[CI95%]	MAF	Direction	P-value	OR[CI95%]	Direction	HetISq	HetPVal	Improved P-value EADB stage I	Improved P-value EADB stage I-ARG-CHI
chr2:127135234:C:T	rs6733839	BIN1	2	127135234	T	C	6.48e-90	1.18 (1.16-1.2)	6.1e-118	1.17[1.16–1.19]	0.389	0.1814	1.13[0.94-1.36]	0.4359	0.9985	0.3346	1.16[0.86-1.57]	0.4712	0.9972	0.1003	1.14[0.97-1.33]	0.4454	++	3.77e-90	1.18[1.16-1.20]	+++	0	0.893	yes	0.0592	1.31[0.99-1.74]	0.5097	0.9971	0.0133	1.18 [1.04-1.36]	0.4627	+++	6.09e-91	1.18 [1.16-1.20]	++++	0	0.836	yes	yes
chr5:180201150:G:A	rs113706587	RASGEF1C	5	180201150	A	G	3.38e-12	1.1 (1.07-1.13)	2.2e-16	1.09[1.07–1.12]	0.11	0.0189	1.47[1.07-2.04]	0.0947	0.9105	0.0016	2.39[1.39-4.11]	0.0905	0.9767	0.0003	1.67[1.27-2.21]	0.0936	++	3.78e-13	1.10[1.07-1.13]	+++	81.9	0.004	yes	0.86	0.96[0.58-1.57]	0.0976	0.9152	0.0008	1.50 [1.18-1.90]	0.0947	+++	3.41e-13	1.10 [1.07-1.13]	++++	72.8	0.012	yes	yes
chr10:11676714:A:G	rs7912495	USP6NL	10	11676714	G	A	2.87e-12	1.06 (1.04-1.08)	9.7e-19	1.06[1.05–1.08]	0.462	0.7278	1.03[0.86-1.25]	0.4877	0.9464	0.6723	1.07[0.79-1.45]	0.4962	0.9736	0.6046	1.04[0.89-1.23]	0.49	--	2.7e-12	1.06[1.04-1.08]	---	0	0.969	yes	0.8823	1.02[0.76-1.37]	0.4862	0.936	0.5733	0.96 [0.84-1.10]	0.511	---	2.67e-12	0.94 [0.93-0.96]	----	0	0.992	yes	yes
chr14:52924962:A:G	rs17125924	FERMT2	14	52924962	G	A	5.82e-10	1.09 (1.06-1.12)	8.3e-16	1.1[1.07–1.12]	0.089	0.2068	1.24[0.89-1.74]	0.0766	0.9836	0.8854	1.05[0.55-2.00]	0.0627	1	0.2356	1.20[0.89-1.62]	0.0737	--	3.23e-10	1.09[1.06-1.12]	---	0	0.75	yes	0.9878	1.00[0.63-1.60]	0.1022	0.9776	0.2295	0.86 [0.67-1.10]	0.9171	---	2.98e-10	0.91 [0.89-0.94]	----	0	0.902	yes	yes
chr16:30010081:C:T	rs1140239	DOC2A	16	30010081	T	C	4.61e-12	0.94 (0.93-0.96)	2.6e-13	0.94[0.93–0.96]	0.379	0.0342	0.81[0.66-0.98]	0.3046	0.9834	0.8423	0.96[0.67-1.39]	0.2451	0.9915	0.0505	0.84[0.71-1.00]	0.2911	--	1.92e-12	0.94[0.93-0.96]	---	14.7	0.309	yes	0.2945	0.85[0.62-1.15]	0.323	0.9549	0.0679	0.87 [0.75-1.01]	0.3	---	1.84e-12	0.94 [0.93-0.96]	----	0	0.502	yes	yes
chr17:44352876:C:T	rs5848	GRN	17	44352876	T	C	1.76e-12	1.07 (1.05-1.09)	2.4e-20	1.07[1.06–1.09]	0.289	0.6013	1.06[0.85-1.32]	0.2628	0.9183	0.0075	1.68[1.15-2.46]	0.2206	0.9444	0.072	1.19[0.98-1.44]	0.2521	++	8.11e-13	1.07[1.05-1.09]	+++	63.5	0.065	yes	0.4728	1.14[0.79-1.65]	0.2122	0.9003	0.08	1.16 [0.98-1.37]	0.2424	+++	7.54e-13	1.07 [1.05-1.09]	++++	45.3	0.14	yes	yes
chr19:1854254:G:GC	rs149080927	KLF16	19	1854254	G	GC	6.14e-09	1.05 (1.04-1.07)	5.1e-10	1.05[1.04–1.07]	0.48	0.7262	1.04[0.85-1.27]	0.5954	0.8294	0.918	1.02[0.74-1.39]	0.621	0.9666	0.7263	1.03[0.87-1.22]	0.6029	++	5.89e-09	1.05[1.04-1.07]	+++	0	0.961	yes	0.1892	0.80[0.57-1.12]	0.288	0.8732	0.5485	1.05 [0.90-1.22]	0.628	+++	5.06e-09	1.05 [1.04-1.07]	++++	0	0.984	yes	yes
chr20:56423488:A:G	rs6014724	CASS4	20	56423488	G	A	4.84e-16	0.89 (0.86-0.91)	4.1e-21	0.89[0.87–0.91]	0.09	0.2802	0.86[0.65-1.13]	0.1491	0.9419	0.0175	0.61[0.41-0.92]	0.2227	0.9691	0.0259	0.77[0.62-0.97]	0.1723	++	8.47e-17	0.89[0.86-0.91]	+++	39.2	0.193	yes	0.1786	0.78[0.54-1.12]	0.2073	0.9302	0.0112	1.27 [1.06-1.54]	0.8165	+++	4.48e-17	1.13 [1.10-1.16]	++++	15.9	0.312	yes	yes

## Sheet: Supplementary Table 4
Supplementary Table 4. FBXO33 chr14:39418472:G:A; rs74745468
Analysis	Effect allele	Freq.	OR[95% CI]†	P-value	Direction
COL	A	0.0832899	1.25[0.73-2.13]	0.411902	+
ARG-CHI	A	0.0865	1.09[0.82-1.44]	0.557	+++
COL-ARG-CHI	A	0.0857	1.15[0.90-1.47]	0.2618	+++
EADB stage I	A	0.0875	1.09[1.06-1.12]	1.396e-08	++-+++-++++-
EADB-ARG-CHI	A	0.0875	1.09[1.06-1.12]	1.203e-08	+++
EADB-COL-ARG-CHI	A	0.088	1.09[1.06-1.12]	8.39e-09	++++
Abbreviations: chr, chromosome; CI, confidence interval; OR, odds ratio.
Freq, frequency of effect allele.
†Odds ratio [95% confidence interval].

## Sheet: Supplementary Table 5
Supplementary Table 5. SNPs included in the best fit model (P-thershold = 0.228) derived from ARG-CHI base dataset.
CHR	BP	ID	Gene	Allele 1 (MAF)	P
5	180201150	rs113706587	RASGEF1C	A	0.0002855
2	37304796	rs17020490	PRKD3	C	0.001144
19	1050875	rs12151021	ABCA7	G	0.01561
1	207577223	rs679515	CR1	C	0.02389
20	56423488	rs6014724	CASS4	G	0.0259
14	106665591	rs10131280	IGH_gene_cluster.2	A	0.03015
16	81739398	rs12446759	PLCG2	A	0.04977
16	30010081	rs1140239	DOC2A	T	0.05051
16	90103687	rs56407236	PRDM7	A	0.05186
19	54267597	rs587709	LILRB2	T	0.07108
17	44352876	rs5848	GRN	T	0.07202
17	18156140	rs2242595	MYO15A	A	0.09075
2	127135234	rs6733839	BIN1	T	0.1003
2	202878716	rs139643391	WDR12	T	0.1059
6	41181270	rs60755019	TREM2L	G	0.1116
8	144103704	rs34173062	SHARPIN	A	0.1123
8	27362470	rs73223431	PTK2B	T	0.1127
7	8204382	rs10952097	ICA1	C	0.1532
6	41036354	rs10947943	UNC5CL	A	0.1746
8	27607795	rs11787077	CLU	C	0.1875
7	100334426	rs7384878	SPDYE3	T	0.19
1	109345810	rs141749679	SORT1	C	0.2113
16	79574511	rs450674	MAF	C	0.2188
6	41161514	rs75932628	TREM2 R47H	T	0.228
Abbreviations: Chr, chromosome; BP, genomic position; ID, snp identifier; Gene, gene name; Allele 1, menor allele;
P, p-value of each variant in the base dataset.

## Sheet: Supplementary Table 6
Supplementary Table 6. Likelihood ratio test (LR) for APOE-PRS interaction across PRS models in the Colombian cohort.
PRS model	Base GWAS	PRS construction	χ²	P
PRSGS-only	ARG–CHI	Without APOE	-	0.77
		APOE ε2 & ε4 included as covariates	4.51	0.105
PRSLD-pruned	ARG–CHI	Without APOE	-	0.21
		APOE ε2 & ε4 included as covariates	5.73	0.057
PRSGS-only	EADB	Without APOE	4.55	0.103
		APOE ε2 & ε4 included as covariates	4.55	0.103
PRSLD-pruned	EADB	Without APOE	1.05	0.59
		APOE ε2 & ε4 included as covariates	1.64	0.44
Abbreviations: PRS model; type of polygenic risk score used in the analysis; Base GWAS, genome-wide
association study from which SNP effect sizes were derived to build the PRS; PRS construction,
method used to generate the PRS; χ², chi-square statistic from the likelihood ratio test comparing
regression models; P, p value.
